# Supplementary material
Source: publisher figshare collection journal article supplement (https://diabetesjournals.figshare.com/ndownloader/files/28819959)
Supplement: Supplementary file 1 [file 28819959]

## Sheet: Genetic-instrument_info
ESM Table 1 - Genetic instrument information
Type-2 diabetes (Mahajan et al., 2018)						HbA1c (Wheeler et al., 2017)						Reaction time (Davies et al., 2018)
SNP	Gene	Chromosome	Position	Effect allele	Other allele	SNP	Gene	Chromosome	Position	Effect allele	Other allele	SNP	Gene	Chromosome	Position	Effect allele	Other allele
rs1005752	HMG20A	15	77818128	A	C	rs1046896	FN3KRP	17	80685533	T	C	rs10125715	KIF27	9	86528858	T	A
rs10096633	LPL	8	77818128	C	T	rs10774625	ATXN2	12	111910219	G	A	rs1032501	UBE2E2-AS1	3	23240671	C	G
rs10097617	TP53INP1	8	95961626	T	C	rs10823343	HK1	10	71091013	A	G	rs1054442	DDN	12	49389320	C	A
rs10193538	BNIPL	2	58981064	T	G	rs10830963	MTNR1B	11	92708710	G	C	rs10775404	KANSL1	17	44167366	C	A
rs10195252	GRB14/COBLL1	2	165513091	T	C	rs11086054	MYO9B	19	17246737	A	T	rs10804171	CBX3P6, KCNJ3	2	155777638	T	C
rs10228066	DGKB	7	15063569	T	C	rs11224302	CNTN5	11	100456604	C	T	rs10911301	NMNAT2	1	183282575	G	A
rs10406327	PEPD	19	33890838	C	G	rs11248914	ITFG3	16	293562	T	C	rs11205668	AGBL4	1	50416830	T	C
rs10406431	GIPR	19	46157019	A	G	rs11558471	SLC30A8	8	118185733	A	G	rs13219424	PTPRK	6	128332084	T	C
rs1042725	HMGA2	12	66358347	T	C	rs11603334	ARAP1	11	72432985	G	A	rs1351848	AC068858.1, PRDM11	11	45073858	T	C
rs1043246	ZZEF1	17	3828086	G	C	rs11619319	PDX1	13	28487599	G	A	rs1385253	AC107074.1	4	152749595	C	T
rs1061810	HSD17B12	11	43877934	A	C	rs11708067	ADCY5	3	123065778	A	G	rs141885450	LINC02392,AC126178.1	12	90559122	C	T
rs10811660	CDKN2A/B	9	22134068	G	A	rs11964178	C6orf183	6	109562035	A	G	rs1503043	LINC01982,CA10	17	50294365	G	C
rs10830963	MTNR1B	11	92708710	G	C	rs12621844	FOXN2	2	48414735	T	C	rs16822665	DPP4	2	162901327	T	C
rs10842994	KLHDC5	12	27965150	C	T	rs13134327	FREM3	4	144659795	A	G	rs16959783	SEMA6D,AC012050.1	15	47896550	T	C
rs10882101	HHEX/IDE	10	94462427	T	C	rs1467311	KLF4	9	110536932	G	A	rs1734197	AC040168.1	16	56215936	T	C
rs10893829	ETS1	11	128042575	T	C	rs1558902	FTO	16	53803574	A	T	rs2040879	AC004854.2,AC004854.1	7	44946241	C	T
rs10908278	HNF1B	17	36099952	T	A	rs174577	FADS2	11	61604814	C	A	rs2604268	AL513124.1,AL355674.1	9	76909386	T	C
rs10937721	WFS1	4	6306763	C	G	rs17509001	ATAD2B	2	24021231	G	T	rs264979	AC013727.1,AC018880.2	2	104269262	T	A
rs10974438	GLIS3	9	4291928	C	A	rs17533903	MYO9B	19	17256523	A	G	rs2869529	AC007744.1,CCDC85A	2	56472159	C	T
rs11070332	LTK	15	41809205	A	G	rs17747324	TCF7L2	10	114752503	C	T	rs323299	KIAA1328	18	34668147	T	G
rs1112718	HHEX/IDE	10	94479107	A	G	rs1800562	HFE	6	26093141	G	A	rs35066740	AC073091.4,AC073091.3	2	76459530	T	G
rs112498319	RREB1	6	7035734	C	A	rs198846	HFE	6	26107463	G	A	rs4627212	AL161423.1,LINC00374	13	58822051	G	A
rs11257655	CDC123/CAMK1D	10	12307894	T	C	rs2110073	PHB2	12	7075882	T	C	rs4673905	SPATS2L,AC004464.1	2	201163783	G	A
rs1127215	PTGFRN	1	117532790	C	T	rs2191349	DGKB	7	15064309	T	G	rs4852778	ZNF638	2	71544954	A	G
rs115505614	PAM	5	102422968	T	C	rs2375278	SYF2	1	25529038	A	G	rs4946935	FOXO3	6	109000742	G	A
rs11688682	GLI2	2	121347612	G	C	rs2383208	MTAP	9	22132076	A	G	rs56335290	APC,LINC02200	5	112036634	A	C
rs11688931	GLI2	2	121318166	C	G	rs2408955	SENP1	12	48499131	T	G	rs568039055	LRRC37A2,ARL17A	17	44632463	C	G
rs11699802	CEBPB	20	48832135	C	T	rs267738	CERS2	1	150940625	T	G	rs58984824	MED13L,AC079384.2	12	116771071	A	C
rs11708067	ADCY5	3	123065778	A	G	rs282587	ATP11A	13	113351662	G	A	rs61786416	PTBP2	1	97283538	G	A
rs11709077	PPARG	3	12336507	G	A	rs3782123	BET1L	11	205198	C	A	rs62074125	WNT3	17	44852612	C	A
rs11759026	CENPW	6	126792095	G	A	rs3824065	GCK	7	44247258	C	T	rs648997	ATXN2	12	111976776	T	C
rs11820019	CCND1	11	69448758	T	C	rs4607517	GCK	7	44235668	A	G	rs66534382	ZBTB7A	19	4056366	A	G
rs11967262	VEGFA	6	43760327	G	C	rs4737009	ANK1	8	41630405	A	G	rs6870103	PFDN1,HBEGF	5	139692515	T	G
rs12454712	BCL2A	18	60845884	T	C	rs4745982	HK1	10	71089843	T	G	rs7075591	ARID5B	10	63670814	A	G
rs1260326	GCKR	2	27730940	C	T	rs4783565	CDH3	16	68750190	A	G	rs73464507	PRDM11	11	45123931	C	G
rs12642790	SCD5	4	83578271	A	G	rs4820268	TMPRSS6	22	37469591	G	A	rs75543711	YWHAE	17	1256074	A	G
rs12811407	FBRSL1	12	133069698	A	G	rs4894799	FNDC3B	3	171795540	A	G	rs7598246	METAP1D	2	172866359	C	T
rs12910825	PRC1	15	91511260	G	A	rs560887	G6PC2	2	169763148	C	T	rs7783359	AC006148.1	7	123689194	A	T
rs13085136	SHQ1	3	72865183	C	T	rs579459	ABO	9	136154168	C	T	rs77917390	NREP	5	111134058	A	T
rs1316776	DMGDH	5	78430607	C	A	rs592423	CITED2	6	139840693	A	C	rs77998199	OLA1,RPSAP24	2	174928752	G	A
rs13262861	ANK1	8	41508577	C	A	rs6474359	ANK1	8	41549194	T	C	rs7936413	DGKZ	11	46393958	C	T
rs1359790	SPRY2	13	80717156	G	A	rs6980507	SLC20A2	8	42383084	A	G	rs80054135	AC073114.1	7	109777798	T	A
rs13737	PTPN9	15	75932129	G	T	rs7040409	C9orf47	9	91503236	C	G	rs925229	MFSD2B	2	24234440	G	A
rs1377807	ZZEF1	17	4045440	C	G	rs7616006	SYN2	3	12267648	A	G	rs936414	KCNC2	12	75548466	G	A
rs1412234	LINGO2	9	28410683	C	T	rs7756992	CDKAL1	6	20679709	G	A
rs1412830	CDKN2A/B	9	22043612	C	T	rs8192675	SLC2A2	3	170724883	T	C
rs1421085	FTO	16	53800954	C	T	rs837763	CDT1	16	88853729	T	C
rs1426371	WSCD2	12	108629780	G	A	rs857691	SPTA1	1	158626378	T	C
rs148766658	ANK1	8	41552046	C	T	rs9604573	GAS6	13	114542858	T	C
rs1493694	NOTCH2	1	120526982	T	C	rs9818758	USP4	3	49382925	A	G
rs1531583	PCGF3	4	744972	T	G	rs9914988	ERAL1	17	27183104	A	G
rs1562396	KLF14	7	130457914	G	A
rs1708302	JAZF1	7	28198677	C	T
rs17168486	DGKB	7	14898282	T	C
rs17250977	ANKH	5	14753745	G	A
rs17689007	MSRA	8	9974824	G	A
rs177045	NEUROG3	10	71321279	G	A
rs17791513	TLE4	9	81905590	A	G
rs1783541	MAP3K11	11	65294799	T	C
rs17836088	NRXN3	14	79932041	C	G
rs1796330	TSPAN8/LGR5	12	71522953	G	C
rs1800574	HNF1A	12	121416864	T	C
rs1800961	HNF4A	20	43042364	T	C
rs1801212	WFS1	4	6302519	A	G
rs1801645	PIM3	22	50356850	C	T
rs180988137	TCF7L2	10	114751173	G	A
rs184509201	TCF7L2	10	114740337	C	G
rs2028150	CEP68	2	65655012	C	G
rs2197973	USP44	12	95928560	T	C
rs2237895	KCNQ1	11	2857194	C	A
rs2237897	KCNQ1	11	2858546	C	T
rs2238689	GIPR	19	46178661	C	T
rs2249105	CEP68	2	65287896	A	G
rs2258238	HMGA2	12	66221060	T	A
rs2283220	KCNQ1	11	2755548	A	G
rs2307111	POC5	5	75003678	T	C
rs231361	KCNQ1	11	2691500	A	G
rs243024	BCL11A	2	60583665	A	G
rs2456530	ONECUT1	15	53091553	T	C
rs2642588	NEUROG3	10	71466578	G	T
rs2796441	TLE1	9	84308948	G	A
rs2800733	SOGA3	6	127416930	A	G
rs2820446	LYPLAL1	1	219748818	C	G
rs28505901	GPSM1	9	139241030	G	A
rs2972144	IRS1	2	227101411	G	A
rs3111316	FARSA	19	13038415	A	G
rs3217792	CCND2	12	4384696	C	T
rs3217860	CCND2	12	4399050	G	A
rs340874	PROX1	1	214159256	C	T
rs34715063	RASGRP1	15	38873115	C	T
rs348330	ABCB10	1	229672955	G	A
rs34855406	MLX	17	40731411	C	G
rs35352848	UBE2E2	3	23455582	T	C
rs35895680	TTLL6	17	47060322	C	A
rs35913461	TMEM18	2	653575	C	T
rs3768321	MACF1	1	40035928	T	G
rs3774723	PSMD6	3	63962339	G	A
rs3798519	TFAP2B	6	50788778	C	A
rs3802177	SLC30A8	8	118185025	G	A
rs3810291	ZC3H4	19	47569003	A	G
rs3887925	ST6GAL1	3	186665645	T	C
rs41277236	NEUROG3	10	71332301	T	C
rs4238013	CCND2	12	4376089	C	T
rs429358	TOMM40/APOE	19	45411941	T	C
rs4457053	ZBED3	5	76424949	G	A
rs465002	ANKRD55	5	55808475	T	C
rs4686471	LPP	3	187740899	C	T
rs4688760	RBM6	3	49980596	T	C
rs4709746	QKI	6	164133001	C	T
rs4736819	ANK1	8	41509915	T	C
rs474513	SLC22A3	6	160770312	A	G
rs4804833	MAP2K7	19	7970635	A	G
rs4810426	HNF4A	20	43001721	T	C
rs4929965	INS/IGF2	11	2197286	A	G
rs4932265	AP3S2	15	90423293	T	C
rs4977213	BOP1	8	145507304	C	T
rs5213	KCNJ11	11	17408404	C	T
rs523288	MC4R	18	57848369	T	A
rs539515	SEC16B	1	177889025	C	A
rs56337234	MAEA	4	1784403	C	T
rs56348580	HNF1A	12	121432117	G	C
rs57235767	MTNR1B	11	93013531	C	T
rs58730668	ACSL1	4	185717759	T	C
rs601945	MHC	6	32573415	G	A
rs6070625	GNAS	20	57394628	G	C
rs62107261	TMEM18	2	422144	T	C
rs62492368	AOC1	7	150537635	A	G
rs6458354	VEGFA	6	43814190	C	T
rs6459733	MNX1	7	156930550	G	C
rs6518681	MTMR3/ASCC2	22	30609554	G	A
rs6600191	ITFG3	16	295795	T	C
rs67232546	ETS1	11	128398938	T	C
rs6780171	IGF2BP2	3	185503456	A	T
rs6885132	ANKH	5	14768092	C	G
rs7022807	HAUS6	9	19067833	G	A
rs702634	ARL15	5	53271420	A	G
rs703972	ZMIZ1	10	80952826	G	C
rs7078559	HHEX/IDE	10	93924663	T	C
rs7178762	USP3	15	63871292	C	T
rs718314	ITPR2	12	26453283	G	A
rs72802342	BCAR1	16	75234872	C	A
rs72926932	TCF4	18	53050646	C	A
rs738408	PNPLA3	22	44324730	T	C
rs74653713	MBNL1	3	152417881	C	A
rs76011118	CDKN2A/B	9	22133773	A	G
rs7669833	TMEM154	4	153513369	T	A
rs76895963	CCND2	12	4384844	T	G
rs77464186	CENTD2/ARAP1	11	72460398	A	C
rs7756992	CDKAL1	6	20679709	G	A
rs78025551	TCF7L2	10	114757956	C	G
rs7903146	TCF7L2	10	114758349	T	C
rs79687284	PROX1	1	214150821	C	G
rs80147536	THADA	2	43698028	A	T
rs8037894	C2CD4A/B	15	62394264	G	C
rs8107974	TM6SF2	19	19388500	T	A
rs862320	NFAT5	16	69651866	C	T
rs878521	GCK	7	44255643	A	G
rs9379084	RREB1	6	7231843	G	A
rs9563615	SRGAP2D	13	59077406	A	T
rs9569864	PCDH17	13	58965435	C	T
rs9687832	ANKRD55	5	55861595	A	G
rs9860730	ADAMTS9	3	64701146	A	G
rs9873618	SLC2A2	3	170733076	G	A

## Sheet: Sample characteristics
ESM Table 2 - Sample characteristics
	Mean (SD) / N (%)
Age (years)	56.7 (8.0)
Sex (Male)	188,636 (54)
Deprivation
Least deprived	56,349 (20)
Most deprived	56,264 (20)
Smoking
Ever	93916 (27)
Physical activity (number of days)±	3.6 (2.3)
HbA1c (mmol/mol)	35.9 (6.3)
HbA1c (%)	5.4 (0.5)
Reaction time (ms)	554.6 (110.9)
Visual memory (errors)	4.1 (3.3)
Hippocampal volume (mm3)	3830.0 (433.4)
White matter hyperintensity volume (mm3)*	2824 (4261)
Body Mass Index (kg/m2)	27.3 (4.7)
Systolic blood pressure (mmHg)	138.2 (18.7)
Triglycerides (mmol/mol)*	1.5 (1.11)
Total cholesterol (mmol/mol)	5.7 (1.1)
C-Reactive protein (mg/l)*	1.3 (2.0)
Diabetes	14,010 (4)
Stroke	6301 (1.8)
*Median (IQR)
±Number of days per week of moderate physical activity for >10 minutes

## Sheet: T2D_SNPs_confounders
ESM Table 3 - Associations between diabetes SNPs and confounders
	BMI				Deprivation				SBP				Total cholesterol				CRP				Triglycerides				Stroke				Smoking
SNP	Beta	SE	P-value	BH-significance	Beta	SE	P-value	BH-significance	Beta	SE	P-value	BH-significance	Beta	SE	P-value	BH-significance	Beta	SE	P-value	BH-significance	Beta	SE	P-value	BH-significance	OR	SE	P-value	BH-significance	OR	SE	P-value	BH-significance
rs1005752	0.0608	0.0139	1.234e-05	Significant	0.0174	0.0085	0.04178	Not significant	0.0581	0.0554	0.2943	Not significant	0.0046	0.0034	0.171	Not significant	0.0112	0.0111	0.3094	Not significant	0.0077	0.0026	0.002875	Significant	1.0094	0.0201	0.6428	Not significant	0.9988	0.0063	0.8476	Not significant
rs10096633	-0.0016	0.0189	0.9305	Not significant	0.0222	0.0116	0.05613	Not significant	0.0954	0.0753	0.2054	Not significant	-0.0035	0.0046	0.4502	Not significant	0.0378	0.0151	0.01221	Significant	0.1697	0.0035	0	Significant	1.0027	0.0273	0.9213	Not significant	1.0166	0.0086	0.05541	Not significant
rs10097617	-0.0156	0.0125	0.2126	Not significant	-0.0108	0.0077	0.1585	Not significant	0.1857	0.0497	0.000188	Significant	-0.0084	0.003	0.005674	Significant	-0.0146	0.0099	0.1399	Not significant	0.0045	0.0023	0.05511	Significant	1.0028	0.018	0.8778	Not significant	1.0044	0.0057	0.4408	Not significant
rs10193538	0.0943	0.0129	2.284e-13	Significant	0.0154	0.0079	0.05058	Not significant	0.0574	0.0512	0.2627	Not significant	-0.0042	0.0031	0.1759	Not significant	0.0115	0.0102	0.2589	Not significant	0.0037	0.0024	0.1221	Significant	1.0163	0.0186	0.3829	Not significant	0.9863	0.0058	0.01766	Significant
rs10195252	-0.0493	0.0127	0.000103	Significant	0.0034	0.0078	0.6597	Not significant	0.24	0.0506	2.066e-06	Significant	0.0073	0.0031	0.01848	Significant	-0.0275	0.0101	0.006471	Significant	0.0328	0.0024	7.644e-44	Significant	0.9902	0.0183	0.5899	Not significant	1.0057	0.0058	0.3208	Not significant
rs10228066	0.0146	0.0125	0.2421	Not significant	0.0025	0.0077	0.741	Not significant	0.0035	0.0499	0.9435	Not significant	0.003	0.003	0.3184	Not significant	0.002	0.01	0.8383	Not significant	0.0018	0.0023	0.4435	Not significant	1.0068	0.0181	0.7061	Not significant	1.0002	0.0057	0.9714	Not significant
rs10406327	0.017	0.0125	0.1735	Not significant	-0.0028	0.0077	0.7179	Not significant	0.0266	0.0497	0.5931	Not significant	-0.002	0.003	0.5055	Not significant	0.0275	0.0099	0.005545	Significant	0.011	0.0023	2.473e-06	Significant	0.9899	0.018	0.5733	Not significant	1.0054	0.0057	0.3406	Not significant
rs10406431	0.0341	0.0125	0.006398	Significant	-0.0107	0.0077	0.1638	Not significant	0.0002	0.0499	0.9965	Not significant	-0.0081	0.003	0.007773	Significant	0.0101	0.01	0.3098	Not significant	0.0062	0.0023	0.007635	Significant	1.0089	0.0181	0.6236	Not significant	0.989	0.0057	0.05184	Not significant
rs1042725	-0.0154	0.0125	0.2152	Not significant	0.0134	0.0077	0.0797	Not significant	0.2002	0.0496	5.521e-05	Significant	-0.0044	0.003	0.1491	Not significant	0.0185	0.0099	0.06148	Significant	0.0132	0.0023	1.444e-08	Significant	1.0065	0.018	0.7174	Not significant	1.0132	0.0057	0.02016	Significant
rs1043246	0.0256	0.017	0.1322	Significant	-0.0139	0.0105	0.183	Not significant	0.0836	0.0678	0.2176	Not significant	0.0007	0.0041	0.8684	Not significant	-0.0007	0.0136	0.9606	Not significant	0.0032	0.0032	0.316	Not significant	0.9541	0.025	0.06003	Not significant	1.0013	0.0077	0.8698	Not significant
rs1061810	0.0991	0.0137	5.024e-13	Significant	-0.007	0.0084	0.4039	Not significant	0.0799	0.0546	0.1437	Not significant	0.003	0.0033	0.374	Not significant	0.0277	0.0109	0.01119	Significant	0.0078	0.0026	0.002189	Significant	1.019	0.0197	0.3394	Not significant	1.0015	0.0062	0.8056	Not significant
rs10811660	-0.0332	0.0164	0.04264	Significant	-0.0007	0.0101	0.9453	Not significant	0.0162	0.0653	0.8038	Not significant	0.0043	0.004	0.2785	Not significant	0.0067	0.0131	0.6058	Not significant	0.0134	0.0031	1.263e-05	Significant	1.0024	0.0237	0.9193	Not significant	1.0015	0.0074	0.839	Not significant
rs10830963	0.028	0.0139	0.04437	Significant	0.0037	0.0086	0.662	Not significant	0.1556	0.0555	0.005035	Significant	-0.0016	0.0034	0.6278	Not significant	-0.006	0.0111	0.5876	Not significant	0.0112	0.0026	1.718e-05	Significant	0.9903	0.0201	0.6268	Not significant	0.9999	0.0063	0.9851	Not significant
rs10842994	-0.0118	0.0156	0.4516	Not significant	0.0077	0.0096	0.4247	Not significant	0.0892	0.0623	0.1522	Not significant	-0.0047	0.0038	0.2171	Not significant	0.0049	0.0124	0.6918	Not significant	0.0025	0.0029	0.398	Not significant	1.0078	0.0226	0.7314	Not significant	1.0058	0.0071	0.4169	Not significant
rs10882101	-0.0124	0.0127	0.3277	Not significant	0.0043	0.0078	0.5826	Not significant	-0.0684	0.0505	0.1755	Not significant	-0.0022	0.0031	0.4742	Not significant	-0.0125	0.0101	0.2157	Not significant	0.0123	0.0024	2.089e-07	Significant	0.9754	0.0182	0.1706	Not significant	0.9999	0.0057	0.9819	Not significant
rs10893829	0.0192	0.0178	0.2807	Not significant	0.0016	0.011	0.8836	Not significant	0.1142	0.0711	0.1079	Not significant	-0.0119	0.0043	0.006154	Significant	-0.0033	0.0142	0.8174	Not significant	0.0066	0.0033	0.04688	Significant	0.9819	0.0256	0.4757	Not significant	1.0105	0.0081	0.1988	Not significant
rs10908278	-0.0298	0.0125	0.01727	Significant	0.0045	0.0077	0.5615	Not significant	-0.077	0.0499	0.123	Not significant	0.0012	0.003	0.6899	Not significant	-0.0082	0.01	0.4085	Not significant	-0.0004	0.0023	0.8759	Not significant	1.0148	0.0181	0.4149	Not significant	0.9986	0.0057	0.8122	Not significant
rs10937721	0.0198	0.0128	0.1201	Significant	0.0045	0.0078	0.567	Not significant	-0.056	0.0508	0.2703	Not significant	-0.0007	0.0031	0.8108	Not significant	-0.0019	0.0101	0.8544	Not significant	0.0002	0.0024	0.919	Not significant	1.0146	0.0184	0.4318	Not significant	1.0066	0.0058	0.2537	Not significant
rs10974438	-0.0268	0.0131	0.04012	Significant	-0.0091	0.008	0.258	Not significant	-0.0182	0.052	0.7265	Not significant	0.0037	0.0032	0.2406	Not significant	-0.0116	0.0104	0.2626	Not significant	-0.0044	0.0024	0.06811	Significant	0.9708	0.0189	0.117	Not significant	1.0032	0.0059	0.5933	Not significant
rs11070332	0.0137	0.0131	0.297	Not significant	0.026	0.0081	0.001286	Significant	0.0651	0.0523	0.2132	Not significant	0.0006	0.0032	0.86	Not significant	0.031	0.0104	0.002951	Significant	0.0088	0.0024	0.0003104	Significant	1.0075	0.0189	0.6916	Not significant	1.0167	0.006	0.005393	Significant
rs1112718	-0.0234	0.0127	0.0654	Significant	-0.0036	0.0078	0.6443	Not significant	-0.0184	0.0505	0.7156	Not significant	-0.0024	0.0031	0.431	Not significant	-0.0185	0.0101	0.06724	Significant	0.0082	0.0024	0.0004865	Significant	0.9797	0.0182	0.2608	Not significant	0.9966	0.0058	0.5525	Not significant
rs112498319	0.0163	0.0128	0.2025	Not significant	0.0232	0.0078	0.003074	Significant	0.0505	0.0509	0.3208	Not significant	-0.0015	0.0031	0.6327	Not significant	-0.0189	0.0102	0.06291	Significant	0.0008	0.0024	0.7219	Not significant	1.0208	0.0184	0.2617	Not significant	1.0046	0.0058	0.4268	Not significant
rs11257655	0.002	0.0153	0.8962	Not significant	-0.0071	0.0094	0.4472	Not significant	0.2405	0.061	8.011e-05	Significant	-0.0037	0.0037	0.3158	Not significant	0.0151	0.0122	0.2152	Not significant	0.007	0.0029	0.01432	Significant	0.9787	0.0222	0.3321	Not significant	1.0006	0.0069	0.9344	Not significant
rs1127215	-0.0088	0.0126	0.4875	Not significant	-0.0025	0.0078	0.7449	Not significant	0.058	0.0503	0.2487	Not significant	-0.0012	0.0031	0.7022	Not significant	0.0011	0.01	0.9143	Not significant	0.0064	0.0024	0.006777	Significant	1.0012	0.0182	0.9484	Not significant	1.0071	0.0057	0.2193	Not significant
rs115505614	0.0047	0.0286	0.8681	Not significant	-0.0086	0.0176	0.6245	Not significant	0.1744	0.1139	0.1258	Not significant	-0.0117	0.0069	0.09142	Not significant	0.0165	0.0227	0.4656	Not significant	0.0101	0.0053	0.0577	Significant	0.9389	0.0422	0.1352	Not significant	0.9819	0.013	0.161	Not significant
rs11688682	-0.0118	0.0145	0.414	Not significant	0.0026	0.0089	0.7661	Not significant	0.1092	0.0577	0.05835	Significant	-0.0075	0.0035	0.03221	Significant	0.0241	0.0115	0.03661	Significant	0.0155	0.0027	9.703e-09	Significant	1.0354	0.021	0.09783	Not significant	0.9996	0.0066	0.9467	Not significant
rs11688931	-0.0075	0.0174	0.666	Not significant	-0.0104	0.0107	0.3299	Not significant	0.1959	0.0693	0.004731	Significant	-0.0101	0.0042	0.01655	Significant	0.0187	0.0138	0.1754	Not significant	0.0119	0.0032	0.0002396	Significant	1.038	0.0254	0.1422	Not significant	1.0023	0.0079	0.7715	Not significant
rs11699802	0.0177	0.0126	0.1574	Not significant	0.0074	0.0077	0.3404	Not significant	0.0111	0.05	0.8236	Not significant	0.0064	0.003	0.03535	Significant	0.0063	0.01	0.5281	Not significant	0.0014	0.0023	0.5569	Not significant	1.0056	0.0181	0.757	Not significant	0.9981	0.0057	0.7362	Not significant
rs11708067	-0.0359	0.0145	0.01314	Significant	-0.0164	0.0089	0.06551	Not significant	-0.1232	0.0576	0.0324	Significant	0.0084	0.0035	0.01726	Significant	-0.0377	0.0115	0.001037	Significant	-0.0011	0.0027	0.6861	Not significant	1.0153	0.0209	0.4688	Not significant	1.0043	0.0066	0.5128	Not significant
rs11709077	-0.0799	0.0193	3.389e-05	Significant	0.0047	0.0118	0.6905	Not significant	0.024	0.0768	0.7543	Not significant	-0.0005	0.0047	0.9096	Not significant	-0.0223	0.0153	0.1446	Not significant	0.023	0.0036	1.372e-10	Significant	0.9934	0.0277	0.8118	Not significant	0.9998	0.0087	0.9818	Not significant
rs11759026	-0.0409	0.0149	0.006107	Significant	-0.0192	0.0092	0.03646	Not significant	-0.2463	0.0594	3.425e-05	Significant	-0.0033	0.0036	0.3589	Not significant	-0.0582	0.0119	9.495e-07	Significant	-0.0068	0.0028	0.01415	Significant	0.9708	0.0217	0.1718	Not significant	0.9851	0.0068	0.02649	Significant
rs11820019	0.0657	0.0393	0.09501	Significant	0.0215	0.0242	0.3739	Not significant	0.2255	0.1567	0.1502	Not significant	-0.0042	0.0095	0.6584	Not significant	0.0959	0.0315	0.002319	Significant	0.0018	0.0074	0.806	Not significant	1.146	0.0609	0.02534	Not significant	1.0549	0.018	0.003	Significant
rs11967262	-0.0419	0.0125	0.0007727	Significant	0.0109	0.0077	0.1554	Not significant	0.109	0.0497	0.02828	Significant	0.0078	0.003	0.01023	Significant	0.0006	0.0099	0.9493	Not significant	0.04	0.0023	2.47e-66	Significant	1.0025	0.018	0.8913	Not significant	1.0049	0.0057	0.39	Not significant
rs12454712	-0.0751	0.0129	5.358e-09	Significant	-0.0156	0.0079	0.04899	Not significant	0.1085	0.0512	0.0342	Significant	0.0016	0.0031	0.605	Not significant	-0.0299	0.0102	0.003452	Significant	0.0123	0.0024	3.103e-07	Significant	1.0029	0.0186	0.8741	Not significant	1.0006	0.0058	0.9217	Not significant
rs1260326	0.0404	0.0128	0.001561	Significant	0.0097	0.0078	0.2172	Not significant	-0.1087	0.0508	0.03247	Significant	-0.0545	0.0031	1.749e-69	Significant	-0.1806	0.0101	6.347e-71	Significant	-0.1054	0.0024	0	Significant	0.9883	0.0184	0.5211	Not significant	1.0001	0.0058	0.9829	Not significant
rs12642790	-0.0149	0.0132	0.2594	Not significant	-0.0166	0.0081	0.04096	Not significant	0.0053	0.0526	0.9201	Not significant	0.0032	0.0032	0.3181	Not significant	0.0008	0.0105	0.9409	Not significant	0.0042	0.0025	0.08826	Significant	1.0111	0.019	0.5604	Not significant	0.9912	0.006	0.1398	Not significant
rs12811407	0.0262	0.0132	0.04803	Significant	-0.0121	0.0081	0.1378	Not significant	-0.0881	0.0527	0.09481	Not significant	0.0039	0.0032	0.2275	Not significant	-0.0107	0.0105	0.3099	Not significant	0.0055	0.0025	0.02682	Significant	1.0414	0.019	0.03254	Not significant	1.0051	0.006	0.3941	Not significant
rs12910825	0.0157	0.013	0.2259	Not significant	0.0032	0.008	0.6885	Not significant	-0.0254	0.0517	0.6229	Not significant	-0.0043	0.0032	0.1713	Not significant	0.0148	0.0103	0.1531	Not significant	0.003	0.0024	0.2186	Not significant	0.9993	0.0187	0.9702	Not significant	1.0118	0.0059	0.04607	Significant
rs13085136	0.0046	0.0245	0.8505	Not significant	0.0105	0.0151	0.4874	Not significant	-0.0891	0.0978	0.3619	Not significant	-0.0009	0.006	0.8809	Not significant	0.0088	0.0196	0.6515	Not significant	-0.0039	0.0046	0.3944	Not significant	1.0818	0.0366	0.03155	Not significant	0.9941	0.0111	0.5966	Not significant
rs1316776	0.0275	0.0131	0.03535	Significant	0.0115	0.008	0.1518	Not significant	0.0338	0.052	0.5161	Not significant	-0.0071	0.0032	0.02583	Significant	0.0288	0.0104	0.005573	Significant	0.013	0.0024	8.747e-08	Significant	1.0066	0.0188	0.7273	Not significant	1.0028	0.0059	0.6374	Not significant
rs13262861	0.016	0.0166	0.3343	Not significant	0.0198	0.0102	0.05216	Not significant	-0.0802	0.0662	0.226	Not significant	-0.0089	0.004	0.02679	Significant	-0.0204	0.0132	0.124	Not significant	-0.007	0.0031	0.02343	Significant	0.9744	0.0238	0.2762	Not significant	1.0032	0.0075	0.6689	Not significant
rs1359790	0.0094	0.0138	0.4942	Not significant	-0.0009	0.0085	0.9189	Not significant	-0.0721	0.0548	0.1883	Not significant	-0.0008	0.0033	0.8025	Not significant	0.0201	0.0109	0.06656	Significant	0.0036	0.0026	0.1638	Significant	0.9936	0.0198	0.7464	Not significant	1.0041	0.0062	0.5136	Not significant
rs13737	0.0155	0.0145	0.283	Not significant	-0.0103	0.0089	0.2471	Not significant	0.0658	0.0576	0.2534	Not significant	0.0045	0.0035	0.2018	Not significant	-0.0089	0.0115	0.438	Not significant	-0.0014	0.0027	0.5963	Not significant	1.0145	0.0209	0.4899	Not significant	0.9904	0.0066	0.1415	Not significant
rs1377807	0.0428	0.0134	0.001461	Significant	-0.0167	0.0083	0.04318	Not significant	0.0043	0.0535	0.9356	Not significant	-0.0093	0.0033	0.004147	Significant	0.0034	0.0107	0.753	Not significant	0.0013	0.0025	0.6104	Not significant	1.0239	0.0193	0.2194	Not significant	0.9883	0.0061	0.05308	Not significant
rs1412234	0.1291	0.0133	2.824e-22	Significant	0.0041	0.0082	0.6191	Not significant	0.1048	0.053	0.04805	Significant	-0.0119	0.0032	0.0002364	Significant	0.041	0.0106	0.0001065	Significant	0.0068	0.0025	0.006093	Significant	1.0413	0.0191	0.03355	Not significant	1.0036	0.006	0.5465	Not significant
rs1412830	-0.0273	0.0129	0.03449	Significant	0.0124	0.0079	0.1169	Not significant	-0.1167	0.0514	0.02316	Significant	-0.0101	0.0031	0.001305	Significant	-0.0139	0.0103	0.1761	Not significant	-0.005	0.0024	0.0362	Significant	1.0236	0.0187	0.2116	Not significant	0.9826	0.0059	0.002672	Significant
rs1421085	0.3486	0.0127	5.544e-166	Significant	-0.0116	0.0078	0.138	Not significant	0.2008	0.0506	7.28e-05	Significant	-0.0143	0.0031	3.724e-06	Significant	0.053	0.0101	1.537e-07	Significant	0.0045	0.0024	0.05511	Significant	1.018	0.0183	0.3285	Not significant	1.002	0.0058	0.7238	Not significant
rs1426371	0.025	0.0143	0.08066	Significant	-0.0028	0.0088	0.7509	Not significant	-0.0502	0.0571	0.3789	Not significant	0.0057	0.0035	0.09906	Not significant	0.0094	0.0114	0.4091	Not significant	0.0119	0.0027	9.086e-06	Significant	1.0258	0.0208	0.2199	Not significant	1.0127	0.0065	0.05238	Not significant
rs148766658	0.0161	0.0341	0.6376	Not significant	0.006	0.0209	0.7732	Not significant	0.1011	0.1357	0.4562	Not significant	0.0026	0.0083	0.7506	Not significant	-0.0335	0.0271	0.2151	Not significant	-0.0043	0.0063	0.5015	Not significant	1.005	0.0489	0.9195	Not significant	1.0154	0.0154	0.3212	Not significant
rs1493694	-0.0198	0.0201	0.3241	Not significant	-0.0078	0.0124	0.5288	Not significant	0.1685	0.0801	0.03552	Significant	-0.0032	0.0049	0.5083	Not significant	0.0178	0.016	0.2663	Not significant	-0.0006	0.0037	0.8723	Not significant	1.0775	0.0282	0.007996	Not significant	0.9849	0.0091	0.0954	Not significant
rs1531583	-0.1019	0.0323	0.001607	Significant	0.0091	0.0198	0.6462	Not significant	-0.0543	0.1287	0.6729	Not significant	0.0027	0.0078	0.733	Not significant	-0.0353	0.0256	0.1685	Not significant	-0.0112	0.006	0.06313	Significant	1.038	0.0457	0.4148	Not significant	0.9852	0.0147	0.3113	Not significant
rs1562396	-0.0444	0.0134	0.0009075	Significant	0.0034	0.0082	0.6801	Not significant	0.1368	0.0534	0.01032	Significant	-0.0001	0.0033	0.975	Not significant	-0.0186	0.0107	0.08171	Significant	0.0285	0.0025	4.386e-30	Significant	1.0059	0.0193	0.7607	Not significant	0.9966	0.0061	0.5797	Not significant
rs1708302	-0.0661	0.0125	1.129e-07	Significant	0.0015	0.0077	0.8402	Not significant	0.032	0.0496	0.5192	Not significant	-0.0048	0.003	0.1138	Not significant	0.0185	0.0099	0.06152	Significant	0.0082	0.0023	0.0003956	Significant	1.0248	0.0179	0.1727	Not significant	0.9945	0.0057	0.3313	Not significant
rs17168486	0.018	0.0165	0.2756	Not significant	-0.012	0.0101	0.2344	Not significant	0.1336	0.0656	0.04181	Significant	-0.0034	0.004	0.3909	Not significant	0.0107	0.0131	0.4129	Not significant	0.0043	0.0031	0.157	Significant	0.9947	0.0238	0.8248	Not significant	1.0073	0.0075	0.3325	Not significant
rs17250977	-0.0175	0.0318	0.5836	Not significant	0.0309	0.0196	0.1143	Not significant	-0.2584	0.1268	0.04159	Significant	-0.0111	0.0077	0.1516	Not significant	-0.0619	0.0253	0.01447	Significant	-0.0037	0.0059	0.538	Not significant	1.0056	0.0458	0.9031	Not significant	0.9894	0.0145	0.4625	Not significant
rs17689007	0.077	0.0125	7.535e-10	Significant	-0.015	0.0077	0.05102	Not significant	0.1721	0.0498	0.0005497	Significant	-0.0007	0.003	0.8083	Not significant	0.0188	0.0099	0.05914	Significant	-0.016	0.0023	6.758e-12	Significant	0.9875	0.018	0.4846	Not significant	1.0177	0.0057	0.002026	Significant
rs177045	-0.0033	0.0136	0.8055	Not significant	0.0117	0.0083	0.1605	Not significant	0.0754	0.054	0.1633	Not significant	-0.0032	0.0033	0.3308	Not significant	0.0149	0.0108	0.1683	Not significant	0.001	0.0025	0.6856	Not significant	1.0007	0.0195	0.9708	Not significant	1.0026	0.0062	0.6694	Not significant
rs17791513	0.0538	0.0258	0.03739	Significant	0.0233	0.0159	0.142	Not significant	0.0652	0.1029	0.5264	Not significant	-0.0016	0.0063	0.7987	Not significant	0.0279	0.0206	0.1753	Not significant	0.0097	0.0048	0.04527	Significant	1.0213	0.0375	0.574	Not significant	1.0079	0.0118	0.5061	Not significant
rs1783541	0.0821	0.0151	5.724e-08	Significant	0.0147	0.0093	0.1129	Not significant	0.1315	0.0603	0.02909	Significant	-0.0076	0.0037	0.0373	Significant	0.0206	0.012	0.08621	Significant	0.0098	0.0028	0.0005001	Significant	1.0276	0.0216	0.2072	Not significant	1.0217	0.0069	0.001739	Significant
rs17836088	0.1321	0.015	1.341e-18	Significant	-0.002	0.0092	0.8318	Not significant	0.1158	0.0598	0.05291	Significant	-0.0133	0.0036	0.0002635	Significant	0.0228	0.0119	0.05674	Significant	0.0022	0.0028	0.4311	Not significant	1.0169	0.0216	0.4368	Not significant	0.9881	0.0068	0.07963	Not significant
rs1796330	0.0074	0.0126	0.556	Not significant	-0.0248	0.0077	0.001321	Significant	-0.0287	0.0501	0.5659	Not significant	-0.004	0.003	0.1861	Not significant	-0.0055	0.01	0.5825	Not significant	0.0076	0.0023	0.0011	Significant	0.9861	0.0181	0.4385	Not significant	0.9932	0.0057	0.2342	Not significant
rs1800574	-0.0579	0.0367	0.1147	Significant	-0.0213	0.0225	0.3446	Not significant	-0.2216	0.1462	0.1296	Not significant	-0.0032	0.0089	0.7168	Not significant	-0.158	0.0293	7.01e-08	Significant	0.018	0.0069	0.008655	Significant	1.0849	0.0512	0.1116	Not significant	0.9815	0.0167	0.2633	Not significant
rs1800961	0.0078	0.0357	0.8259	Not significant	-0.0275	0.0219	0.2086	Not significant	-0.1825	0.1421	0.1989	Not significant	-0.1049	0.0087	8.368e-34	Significant	-0.2424	0.0284	1.322e-17	Significant	0.0146	0.0067	0.02832	Significant	1.0727	0.0498	0.1587	Not significant	1.0002	0.0162	0.9912	Not significant
rs1801212	0.0259	0.0138	0.06161	Significant	0.0046	0.0085	0.5924	Not significant	-0.0715	0.0551	0.1949	Not significant	-0.0043	0.0034	0.1971	Not significant	-0.0075	0.011	0.4946	Not significant	0.0006	0.0026	0.8256	Not significant	1.0377	0.0202	0.06624	Not significant	1.0081	0.0063	0.1978	Not significant
rs1801645	0.0143	0.0142	0.3135	Not significant	0.0045	0.0087	0.6038	Not significant	0.1326	0.0566	0.01917	Significant	0	0.0034	0.9968	Not significant	-0.0043	0.0113	0.7026	Not significant	-0.0003	0.0027	0.9068	Not significant	1.0174	0.0204	0.3977	Not significant	0.9988	0.0065	0.8464	Not significant
rs180988137	-0.1444	0.0632	0.02236	Significant	0.028	0.0388	0.4707	Not significant	0.2575	0.2519	0.3066	Not significant	-0.0151	0.0153	0.3238	Not significant	0.0001	0.0505	0.9983	Not significant	0.0039	0.0118	0.7391	Not significant	0.8783	0.0968	0.1802	Not significant	0.9492	0.0289	0.07182	Not significant
rs184509201	0.0301	0.0463	0.5155	Not significant	0.0199	0.0284	0.483	Not significant	-0.0702	0.1843	0.7033	Not significant	0.0098	0.0112	0.3811	Not significant	0.0498	0.0366	0.1733	Not significant	0.0051	0.0086	0.5539	Not significant	0.9355	0.0644	0.3005	Not significant	0.9869	0.0209	0.5267	Not significant
rs2028150	0.0102	0.0127	0.4219	Not significant	-0.0116	0.0078	0.1378	Not significant	0.1916	0.0505	0.0001501	Significant	0.0072	0.0031	0.01988	Significant	0.0127	0.0101	0.2081	Not significant	0.0107	0.0024	6.104e-06	Significant	1.0056	0.0183	0.7609	Not significant	0.9972	0.0058	0.6233	Not significant
rs2197973	0.0194	0.0125	0.1192	Significant	0.0053	0.0077	0.4928	Not significant	0.0557	0.0497	0.2626	Not significant	-0.0039	0.003	0.2008	Not significant	0.0685	0.0099	5.001e-12	Significant	0.0032	0.0023	0.1672	Significant	1.0236	0.018	0.1944	Not significant	1.0156	0.0057	0.006372	Significant
rs2237895	-0.0299	0.0126	0.01767	Significant	-0.0127	0.0077	0.1021	Not significant	0.0573	0.0502	0.2542	Not significant	-0.0117	0.0031	0.0001255	Significant	-0.0073	0.01	0.4682	Not significant	0.0064	0.0024	0.006482	Significant	0.9911	0.0182	0.6226	Not significant	0.9986	0.0057	0.8092	Not significant
rs2237897	-0.1007	0.0317	0.00148	Significant	-0.0638	0.0195	0.001039	Significant	0.0206	0.1262	0.8704	Not significant	0.0041	0.0077	0.5927	Not significant	-0.081	0.0251	0.00127	Significant	0.0071	0.0059	0.2306	Not significant	1.0275	0.0462	0.557	Not significant	0.9833	0.0143	0.2388	Not significant
rs2238689	-0.0779	0.0127	9.531e-10	Significant	0.0034	0.0078	0.6603	Not significant	0.0549	0.0507	0.2793	Not significant	-0.0193	0.0031	4.644e-10	Significant	0.0138	0.0101	0.1721	Not significant	0.0081	0.0024	0.000621	Significant	0.9926	0.0184	0.6875	Not significant	0.9976	0.0058	0.6717	Not significant
rs2249105	0.0157	0.0129	0.2264	Not significant	0.0097	0.008	0.223	Not significant	0.3181	0.0516	6.843e-10	Significant	0.0005	0.0031	0.8629	Not significant	0.001	0.0103	0.9242	Not significant	0.0194	0.0024	1.035e-15	Significant	1.0001	0.0187	0.9964	Not significant	0.997	0.0059	0.6076	Not significant
rs2258238	-0.0016	0.0204	0.9357	Not significant	0.0008	0.0125	0.9505	Not significant	0.0961	0.0813	0.2368	Not significant	-0.0029	0.005	0.5531	Not significant	0.0346	0.0162	0.03276	Significant	0.0128	0.0038	0.0007683	Significant	1.0166	0.0292	0.573	Not significant	1.0042	0.0093	0.6503	Not significant
rs2283220	-0.0011	0.0136	0.9349	Not significant	0.003	0.0084	0.7193	Not significant	0.0505	0.0542	0.3511	Not significant	-0.0083	0.0033	0.01191	Significant	0.0175	0.0108	0.1069	Not significant	0.0006	0.0025	0.8162	Not significant	1.0004	0.0196	0.9841	Not significant	1.0013	0.0062	0.8387	Not significant
rs2307111	0.1358	0.0128	1.763e-26	Significant	0	0.0078	0.9968	Not significant	0.0394	0.0508	0.4383	Not significant	-0.0497	0.0031	6.314e-58	Significant	0.0143	0.0102	0.1589	Not significant	0.0034	0.0024	0.1541	Significant	1.0087	0.0184	0.6387	Not significant	1.0119	0.0058	0.04133	Significant
rs231361	0.0125	0.0144	0.3867	Not significant	0.0084	0.0088	0.3405	Not significant	0.0133	0.0573	0.8159	Not significant	-0.0052	0.0035	0.1329	Not significant	0.01	0.0114	0.3814	Not significant	-0.0009	0.0027	0.7309	Not significant	1.0254	0.0206	0.2246	Not significant	1.0023	0.0065	0.7208	Not significant
rs243024	0.0248	0.0125	0.0483	Significant	0.0024	0.0077	0.7506	Not significant	-0.1484	0.0499	0.002966	Significant	0.0009	0.003	0.7756	Not significant	0.0066	0.01	0.5099	Not significant	-0.0012	0.0023	0.6203	Not significant	1.0386	0.018	0.03553	Not significant	0.9994	0.0057	0.9104	Not significant
rs2456530	0.0719	0.0185	9.853e-05	Significant	0.0026	0.0113	0.8173	Not significant	0.0942	0.0736	0.2005	Not significant	-0.0042	0.0045	0.3544	Not significant	0.044	0.0147	0.002704	Significant	0.0065	0.0034	0.05936	Significant	1.0539	0.0261	0.0442	Not significant	1.0159	0.0084	0.06011	Not significant
rs2642588	0.0079	0.0136	0.5634	Not significant	0.0098	0.0084	0.2395	Not significant	0.0732	0.0542	0.1769	Not significant	0.0057	0.0033	0.0845	Not significant	-0.009	0.0108	0.4036	Not significant	-0.0029	0.0025	0.252	Not significant	1.0353	0.0198	0.07956	Not significant	0.9952	0.0062	0.4325	Not significant
rs2796441	-0.0227	0.0126	0.07163	Significant	0.0125	0.0077	0.1054	Not significant	0.028	0.0501	0.5765	Not significant	-0.0023	0.0031	0.4492	Not significant	0.0029	0.01	0.7756	Not significant	-0.007	0.0023	0.002753	Significant	1.0243	0.0182	0.1875	Not significant	1.005	0.0057	0.3853	Not significant
rs2800733	-0.0508	0.0137	0.0002075	Significant	0.0086	0.0084	0.3051	Not significant	0.0316	0.0545	0.5625	Not significant	-0.0033	0.0033	0.3149	Not significant	-0.014	0.0109	0.1993	Not significant	-0.0083	0.0026	0.001193	Significant	1.0074	0.0198	0.7075	Not significant	1.0014	0.0062	0.8221	Not significant
rs2820446	-0.0571	0.0136	2.724e-05	Significant	-0.025	0.0084	0.002813	Significant	0.1319	0.0542	0.01491	Significant	-0.0001	0.0033	0.9768	Not significant	0.0081	0.0108	0.451	Not significant	0.02	0.0025	2.848e-15	Significant	0.9957	0.0196	0.8251	Not significant	0.9755	0.0062	5.891e-05	Significant
rs28505901	0.0003	0.0145	0.9842	Not significant	0.0118	0.0089	0.1858	Not significant	-0.0341	0.0577	0.5551	Not significant	-0.0047	0.0035	0.1785	Not significant	-0.023	0.0115	0.04595	Significant	-0.0045	0.0027	0.09257	Significant	1.0241	0.021	0.2579	Not significant	1.0216	0.0066	0.001182	Significant
rs2972144	-0.0086	0.013	0.5087	Not significant	0.0042	0.008	0.603	Not significant	0.1824	0.0519	0.0004421	Significant	-0.0076	0.0032	0.01659	Significant	0.0081	0.0104	0.435	Not significant	0.0414	0.0024	5.322e-65	Significant	1.0021	0.0188	0.9107	Not significant	1.0038	0.0059	0.5261	Not significant
rs3111316	0.0338	0.0126	0.007425	Significant	-0.0052	0.0077	0.4989	Not significant	0.0687	0.0502	0.1715	Not significant	-0.0008	0.0031	0.7926	Not significant	-0.0041	0.01	0.6792	Not significant	-0.0022	0.0024	0.3578	Not significant	1.0167	0.0182	0.3648	Not significant	0.9987	0.0057	0.8218	Not significant
rs3217792	-0.0097	0.0227	0.6686	Not significant	0.0233	0.014	0.09522	Not significant	-0.1862	0.0905	0.03961	Significant	-0.004	0.0055	0.4646	Not significant	-0.0127	0.0181	0.4835	Not significant	-0.0059	0.0042	0.1608	Significant	0.9747	0.0326	0.431	Not significant	0.9976	0.0103	0.8177	Not significant
rs3217860	-0.0217	0.0145	0.1341	Significant	-0.0155	0.0089	0.08235	Not significant	0.1451	0.0577	0.01192	Significant	0.0039	0.0035	0.2711	Not significant	0.0258	0.0115	0.02486	Significant	0.0084	0.0027	0.001861	Significant	0.9965	0.0209	0.8665	Not significant	0.9899	0.0066	0.1222	Not significant
rs340874	0.0006	0.0126	0.9625	Not significant	-0.0002	0.0077	0.975	Not significant	-0.0102	0.0501	0.8381	Not significant	0.003	0.0031	0.3325	Not significant	0.0055	0.01	0.5797	Not significant	0.0058	0.0023	0.01352	Significant	0.9977	0.0181	0.8982	Not significant	0.9994	0.0057	0.9194	Not significant
rs34715063	-0.0102	0.0187	0.587	Not significant	0.0101	0.0115	0.3802	Not significant	-0.1534	0.0745	0.03945	Significant	0.0004	0.0045	0.9304	Not significant	0.0108	0.0149	0.4669	Not significant	-0.0032	0.0035	0.3598	Not significant	1.0335	0.0266	0.2154	Not significant	1.0098	0.0085	0.2482	Not significant
rs348330	-0.0036	0.013	0.7819	Not significant	0.0047	0.008	0.5545	Not significant	0.0601	0.0517	0.2451	Not significant	-0.0006	0.0032	0.8562	Not significant	0.0033	0.0103	0.7528	Not significant	0.0039	0.0024	0.1093	Significant	1.0136	0.0187	0.4693	Not significant	1.0041	0.0059	0.4888	Not significant
rs34855406	0.0698	0.0139	4.732e-07	Significant	0.0042	0.0085	0.6208	Not significant	-0.0484	0.0552	0.3807	Not significant	0.0029	0.0034	0.3881	Not significant	0.0354	0.011	0.001305	Significant	0.016	0.0026	5.03e-10	Significant	1.0026	0.0199	0.8976	Not significant	1.0024	0.0063	0.703	Not significant
rs35352848	-0.0018	0.0154	0.9078	Not significant	-0.0031	0.0095	0.7399	Not significant	0.0968	0.0615	0.1153	Not significant	-0.0001	0.0037	0.9835	Not significant	-0.0355	0.0123	0.003853	Significant	0.0037	0.0029	0.1936	Not significant	0.9843	0.0222	0.4757	Not significant	0.9966	0.007	0.6273	Not significant
rs35895680	0.0894	0.0134	2.336e-11	Significant	-0.0232	0.0082	0.004775	Significant	0.1639	0.0533	0.002097	Significant	0.0001	0.0032	0.9788	Not significant	0.0207	0.0106	0.05167	Significant	0.0087	0.0025	0.0004584	Significant	0.9998	0.0193	0.9926	Not significant	1.0181	0.0061	0.003162	Significant
rs35913461	0.26	0.0166	5.11e-55	Significant	-0.0003	0.0102	0.9778	Not significant	0.2562	0.0663	0.0001116	Significant	0.0005	0.004	0.905	Not significant	0.0802	0.0132	1.376e-09	Significant	0.005	0.0031	0.1044	Significant	1.0366	0.0243	0.1394	Not significant	1.0377	0.0076	1.051e-06	Significant
rs3768321	0.0783	0.0157	5.92e-07	Significant	0.0231	0.0096	0.01661	Significant	0.0127	0.0624	0.8388	Not significant	-0.0155	0.0038	4.39e-05	Significant	0.0713	0.0125	1.053e-08	Significant	0.0237	0.0029	5.456e-16	Significant	0.9871	0.0227	0.5661	Not significant	1.0004	0.0071	0.9597	Not significant
rs3774723	0.0521	0.0177	0.003181	Significant	-0.0001	0.0108	0.9895	Not significant	0.1083	0.0703	0.1237	Not significant	0.0006	0.0043	0.8841	Not significant	0.0203	0.014	0.148	Not significant	0.0043	0.0033	0.1926	Not significant	0.9727	0.0252	0.2721	Not significant	1.0161	0.008	0.04636	Significant
rs3798519	0.2085	0.0163	1.829e-37	Significant	0.0013	0.01	0.8958	Not significant	0.1128	0.0649	0.08219	Significant	-0.0091	0.004	0.02099	Significant	0.0209	0.013	0.106	Not significant	0.0031	0.003	0.3082	Not significant	1.0209	0.0233	0.3749	Not significant	1.0086	0.0074	0.2488	Not significant
rs3802177	-0.0377	0.0135	0.005069	Significant	-0.0074	0.0083	0.3717	Not significant	-0.0442	0.0536	0.4096	Not significant	0.0053	0.0033	0.1047	Not significant	-0.0166	0.0107	0.1207	Not significant	0.0114	0.0025	6.03e-06	Significant	0.9661	0.0193	0.07397	Not significant	1.0084	0.0061	0.1725	Not significant
rs3810291	0.1334	0.0133	1.419e-23	Significant	-0.0091	0.0082	0.2652	Not significant	-0.1293	0.0531	0.01485	Significant	-0.0038	0.0032	0.2367	Not significant	0.0229	0.0106	0.03041	Significant	0.0104	0.0025	2.961e-05	Significant	1.0362	0.0193	0.06552	Not significant	1.0274	0.0061	7.86e-06	Significant
rs3887925	-0.0156	0.0126	0.2139	Not significant	-0.0149	0.0077	0.05298	Not significant	-0.0253	0.05	0.6128	Not significant	-0.0047	0.003	0.1254	Not significant	-0.0278	0.01	0.005315	Significant	-0.0038	0.0023	0.1073	Significant	0.9592	0.018	0.02103	Not significant	1.0036	0.0057	0.5302	Not significant
rs41277236	0.0117	0.0319	0.714	Not significant	0.0072	0.0196	0.7136	Not significant	-0.1357	0.1272	0.2859	Not significant	-0.0049	0.0077	0.5299	Not significant	-0.0371	0.0253	0.1429	Not significant	0.0035	0.0059	0.5587	Not significant	1.0287	0.0454	0.5323	Not significant	0.9723	0.0146	0.05396	Not significant
rs4238013	-0.0268	0.0156	0.08623	Significant	-0.0059	0.0096	0.54	Not significant	-0.0116	0.0623	0.8518	Not significant	0.0062	0.0038	0.1023	Not significant	-0.0008	0.0124	0.9515	Not significant	0.0131	0.0029	7.363e-06	Significant	1.0241	0.0224	0.2889	Not significant	0.9847	0.0071	0.03046	Significant
rs429358	0.1084	0.0172	2.907e-10	Significant	0.0076	0.0106	0.4692	Not significant	-0.0411	0.0685	0.5481	Not significant	-0.1898	0.0042	0	Significant	0.5823	0.0136	0	Significant	-0.0647	0.0032	5.002e-91	Significant	0.9961	0.0247	0.8735	Not significant	1.008	0.0078	0.3068	Not significant
rs4457053	-0.0296	0.0133	0.02666	Significant	0.0077	0.0082	0.3481	Not significant	0.0947	0.0532	0.07477	Significant	-0.0011	0.0032	0.7442	Not significant	0.0059	0.0106	0.5763	Not significant	0.0031	0.0025	0.2201	Not significant	1.0276	0.0192	0.155	Not significant	1.0159	0.0061	0.009254	Significant
rs465002	0.0334	0.0143	0.0195	Significant	0.0149	0.0088	0.08878	Not significant	0.2025	0.0569	0.0003754	Significant	-0.0099	0.0035	0.004395	Significant	-0.0307	0.0114	0.006986	Significant	0.0317	0.0027	9.776e-33	Significant	1.0077	0.0206	0.7103	Not significant	0.9995	0.0065	0.9338	Not significant
rs4686471	0.0202	0.0128	0.1162	Significant	-0.0082	0.0079	0.2961	Not significant	0.0822	0.0511	0.1076	Not significant	0.001	0.0031	0.7589	Not significant	-0.0071	0.0102	0.487	Not significant	0.005	0.0024	0.0373	Significant	1.0114	0.0185	0.539	Not significant	0.9925	0.0058	0.199	Not significant
rs4688760	0.1005	0.0135	9.505e-14	Significant	0.0017	0.0083	0.8337	Not significant	0.1883	0.0538	0.0004603	Significant	-0.0107	0.0033	0.001113	Significant	0.0455	0.0107	2.238e-05	Significant	0.0053	0.0025	0.03547	Significant	1.0314	0.0196	0.1142	Not significant	0.9998	0.0061	0.9786	Not significant
rs4709746	-0.0336	0.0184	0.06803	Significant	-0.0033	0.0113	0.769	Not significant	0.2779	0.0734	0.0001517	Significant	0.0029	0.0045	0.5217	Not significant	0.0105	0.0146	0.4715	Not significant	0.0207	0.0034	1.589e-09	Significant	0.9915	0.0265	0.7474	Not significant	1.008	0.0084	0.3417	Not significant
rs4736819	0.0187	0.0125	0.1363	Significant	0.002	0.0077	0.7929	Not significant	-0.0073	0.0499	0.884	Not significant	-0.001	0.003	0.7524	Not significant	-0.0072	0.01	0.4684	Not significant	-0.0044	0.0023	0.05849	Significant	0.9745	0.0181	0.1522	Not significant	1.0059	0.0057	0.3011	Not significant
rs474513	-0.0256	0.0125	0.04048	Significant	-0.0009	0.0077	0.9077	Not significant	0.0963	0.0497	0.05291	Significant	0.0126	0.003	3.277e-05	Significant	0.006	0.0099	0.5469	Not significant	0.0122	0.0023	1.59e-07	Significant	0.9949	0.018	0.7753	Not significant	0.9881	0.0057	0.03466	Significant
rs4804833	-0.0077	0.0128	0.5484	Not significant	0.0058	0.0079	0.4573	Not significant	0.0819	0.051	0.1085	Not significant	-0.0064	0.0031	0.04083	Significant	-0.0317	0.0102	0.001838	Significant	0.0158	0.0024	3.615e-11	Significant	0.9968	0.0184	0.8628	Not significant	1.0043	0.0058	0.4582	Not significant
rs4810426	0.0028	0.0214	0.894	Not significant	0.0013	0.0131	0.9196	Not significant	0.0038	0.0851	0.9641	Not significant	-0.0044	0.0052	0.3946	Not significant	0.0016	0.017	0.9237	Not significant	0.0013	0.004	0.7462	Not significant	0.9905	0.0309	0.7583	Not significant	0.9989	0.0097	0.9078	Not significant
rs4929965	0.0297	0.0128	0.02066	Significant	-0.0062	0.0079	0.4286	Not significant	0.0141	0.0512	0.7827	Not significant	-0.011	0.0031	0.0004023	Significant	0.0126	0.0102	0.2163	Not significant	0.0056	0.0024	0.02027	Significant	0.9786	0.0186	0.243	Not significant	0.998	0.0058	0.7364	Not significant
rs4932265	-0.0169	0.0141	0.2326	Not significant	-0.0024	0.0087	0.78	Not significant	0.0244	0.0563	0.6643	Not significant	0.004	0.0034	0.2478	Not significant	-0.0101	0.0112	0.3682	Not significant	0.0059	0.0026	0.02404	Significant	1.0139	0.0203	0.4966	Not significant	1.0002	0.0064	0.9724	Not significant
rs4977213	-0.0364	0.0128	0.004626	Significant	-0.0045	0.0079	0.5693	Not significant	-0.0495	0.0512	0.333	Not significant	-0.0023	0.0031	0.4601	Not significant	-0.0125	0.0102	0.2205	Not significant	0.0043	0.0024	0.07296	Significant	1.0064	0.0185	0.7307	Not significant	1.0042	0.0058	0.4703	Not significant
rs5213	-0.0578	0.0131	1.023e-05	Significant	0.0055	0.0081	0.4914	Not significant	0.2246	0.0522	1.695e-05	Significant	-0.0077	0.0032	0.0157	Significant	-0.0245	0.0104	0.01899	Significant	0.0031	0.0024	0.2036	Not significant	0.9833	0.0189	0.3736	Not significant	0.983	0.006	0.004014	Significant
rs523288	0.243	0.0147	1.274e-61	Significant	-0.0078	0.009	0.3859	Not significant	-0.0134	0.0584	0.8182	Not significant	-0.0119	0.0036	0.0008529	Significant	0.061	0.0117	1.752e-07	Significant	0.0104	0.0027	0.0001449	Significant	0.9611	0.0214	0.06338	Not significant	1.0103	0.0067	0.1241	Not significant
rs539515	0.2405	0.0154	3.459e-55	Significant	0.0401	0.0094	2.206e-05	Significant	0.0964	0.0612	0.1153	Not significant	-0.0102	0.0037	0.00634	Significant	0.0323	0.0122	0.00813	Significant	0.0022	0.0029	0.4444	Not significant	0.9831	0.0223	0.4444	Not significant	1.0258	0.007	0.0002488	Significant
rs56337234	-0.0361	0.0125	0.003784	Significant	0.0009	0.0077	0.91	Not significant	-0.1752	0.0497	0.0004197	Significant	-0.0022	0.003	0.47	Not significant	0.0014	0.0099	0.8848	Not significant	0.0016	0.0023	0.4933	Not significant	0.9653	0.018	0.04949	Not significant	0.9961	0.0057	0.4915	Not significant
rs56348580	0.0245	0.0135	0.07023	Significant	0.0051	0.0083	0.5369	Not significant	0.0064	0.0539	0.9048	Not significant	0.012	0.0033	0.0002675	Significant	-0.1731	0.0108	3.168e-58	Significant	0.0051	0.0025	0.04425	Significant	1.0188	0.0196	0.341	Not significant	1.0158	0.0061	0.01066	Significant
rs57235767	0.0022	0.0138	0.8754	Not significant	-0.0022	0.0085	0.7923	Not significant	0.0156	0.0548	0.7754	Not significant	-0.0031	0.0033	0.3583	Not significant	0.0072	0.011	0.5105	Not significant	-0.0002	0.0026	0.9311	Not significant	0.9995	0.0199	0.9799	Not significant	1.0033	0.0062	0.5996	Not significant
rs58730668	-0.0151	0.0179	0.4011	Not significant	0.0108	0.011	0.3293	Not significant	0.0411	0.0715	0.5656	Not significant	-0.002	0.0044	0.6392	Not significant	-0.0156	0.0143	0.2753	Not significant	0.0043	0.0033	0.1954	Not significant	1.0154	0.0261	0.5565	Not significant	1.0023	0.0081	0.7774	Not significant
rs601945	0.0179	0.0158	0.257	Not significant	0.0087	0.0097	0.3715	Not significant	0.0664	0.063	0.2916	Not significant	-0.0057	0.0038	0.1349	Not significant	0.14	0.0126	8.868e-29	Significant	0.009	0.0029	0.002218	Significant	1.0186	0.0227	0.4153	Not significant	1.0088	0.0072	0.2207	Not significant
rs6070625	0.0252	0.0125	0.0437	Significant	0.0096	0.0077	0.2094	Not significant	0.0124	0.0497	0.8028	Not significant	0.0003	0.003	0.9266	Not significant	0.008	0.0099	0.4183	Not significant	-0.001	0.0023	0.677	Not significant	1.0193	0.018	0.2876	Not significant	1.009	0.0057	0.1143	Not significant
rs62107261	0.4404	0.0291	1.393e-51	Significant	0.046	0.0179	0.01016	Significant	0.2991	0.1161	0.01	Significant	-0.0066	0.0071	0.3476	Not significant	0.0966	0.0232	3.152e-05	Significant	0.0196	0.0054	0.0003244	Significant	1.0195	0.0423	0.6471	Not significant	1.0837	0.0134	1.923e-09	Significant
rs62492368	-0.0134	0.0136	0.3257	Not significant	-0.0153	0.0084	0.06768	Not significant	-0.0424	0.0543	0.4348	Not significant	-0.0019	0.0033	0.5706	Not significant	-0.0196	0.0109	0.07127	Significant	0.0163	0.0025	1.452e-10	Significant	0.9961	0.0197	0.8419	Not significant	1.0026	0.0062	0.6728	Not significant
rs6458354	-0.0072	0.0137	0.6006	Not significant	0.0094	0.0084	0.2636	Not significant	0.0191	0.0545	0.7262	Not significant	-0.0037	0.0033	0.2687	Not significant	0.0079	0.0109	0.4682	Not significant	-0.0169	0.0026	4.018e-11	Significant	1.0203	0.0196	0.3066	Not significant	1.0083	0.0062	0.1811	Not significant
rs6459733	0.0106	0.0132	0.4226	Not significant	-0.013	0.0081	0.1105	Not significant	0.1243	0.0526	0.01817	Significant	-0.004	0.0032	0.2121	Not significant	-0.0074	0.0105	0.4802	Not significant	0.0053	0.0025	0.03124	Significant	1.0196	0.0191	0.3089	Not significant	1.0022	0.006	0.7183	Not significant
rs6518681	-0.0236	0.0216	0.2747	Not significant	-0.0134	0.0133	0.3123	Not significant	0.0441	0.0861	0.6087	Not significant	-0.0071	0.0052	0.1751	Not significant	0.0005	0.0172	0.9771	Not significant	-0.0021	0.004	0.5967	Not significant	0.9764	0.0308	0.4374	Not significant	0.992	0.0098	0.4133	Not significant
rs6600191	0.0246	0.0162	0.1301	Significant	0.0106	0.01	0.2881	Not significant	0.019	0.0647	0.7691	Not significant	-0.001	0.0039	0.7904	Not significant	0.0069	0.0129	0.5923	Not significant	0.0024	0.003	0.4339	Not significant	0.9883	0.0233	0.6152	Not significant	1.004	0.0074	0.5876	Not significant
rs67232546	0.0085	0.0153	0.5783	Not significant	-0.0094	0.0094	0.3194	Not significant	-0.0126	0.061	0.836	Not significant	-0.0105	0.0037	0.004836	Significant	-0.0091	0.0122	0.453	Not significant	0.0006	0.0029	0.8251	Not significant	1.0407	0.0218	0.06791	Not significant	1.0003	0.0069	0.9677	Not significant
rs6780171	-0.019	0.0135	0.159	Not significant	0.014	0.0083	0.08938	Not significant	0.0594	0.0536	0.268	Not significant	-0.0069	0.0033	0.0337	Significant	0.0073	0.0107	0.493	Not significant	0.0049	0.0025	0.05099	Significant	1.0464	0.0192	0.01832	Not significant	1.0046	0.0061	0.4499	Not significant
rs6885132	0.0106	0.0211	0.6162	Not significant	-0.0071	0.013	0.5833	Not significant	0.0022	0.084	0.9787	Not significant	-0.0033	0.0051	0.5236	Not significant	-0.0093	0.0168	0.5786	Not significant	0.0014	0.0039	0.7237	Not significant	1.0374	0.031	0.2357	Not significant	1.004	0.0096	0.6732	Not significant
rs7022807	-0.0289	0.0127	0.02327	Significant	-0.0102	0.0078	0.1903	Not significant	0.0185	0.0507	0.7148	Not significant	0.0019	0.0031	0.5351	Not significant	-0.0061	0.0101	0.5483	Not significant	-0.0006	0.0024	0.8147	Not significant	0.9971	0.0184	0.8758	Not significant	1.0145	0.0058	0.0129	Significant
rs702634	-0.0507	0.0135	0.0001781	Significant	0.0067	0.0083	0.4216	Not significant	0.1172	0.0539	0.02962	Significant	-0.0081	0.0033	0.01416	Significant	0.0084	0.0108	0.4371	Not significant	0.0145	0.0025	9.477e-09	Significant	0.9863	0.0194	0.478	Not significant	1.0021	0.0061	0.7386	Not significant
rs703972	0.0102	0.0125	0.4126	Not significant	0.006	0.0077	0.4328	Not significant	0.0141	0.0498	0.7776	Not significant	-0.002	0.003	0.5103	Not significant	0.0108	0.0099	0.2761	Not significant	0.0063	0.0023	0.006882	Significant	1.0011	0.018	0.9518	Not significant	0.9965	0.0057	0.5391	Not significant
rs7078559	0.0308	0.0126	0.01491	Significant	-0.0001	0.0078	0.9872	Not significant	0.1257	0.0503	0.01257	Significant	-0.0012	0.0031	0.7028	Not significant	0.0259	0.0101	0.009971	Significant	0.0112	0.0024	2.16e-06	Significant	1.0036	0.0182	0.8448	Not significant	1.0003	0.0057	0.9603	Not significant
rs7178762	0.0169	0.0126	0.1794	Not significant	0.0177	0.0077	0.02201	Not significant	0.0711	0.05	0.1552	Not significant	-0.0095	0.003	0.001897	Significant	-0.0014	0.01	0.8852	Not significant	0.0108	0.0023	4.218e-06	Significant	1.0277	0.0181	0.1308	Not significant	1.0078	0.0057	0.1737	Not significant
rs718314	-0.0301	0.0145	0.03819	Significant	0.0163	0.0089	0.06853	Not significant	0.1203	0.0579	0.0377	Significant	-0.0068	0.0035	0.05459	Significant	-0.0112	0.0116	0.3305	Not significant	0.014	0.0027	2.275e-07	Significant	1.0136	0.0209	0.517	Not significant	0.9893	0.0066	0.1028	Not significant
rs72802342	-0.0301	0.0237	0.2041	Not significant	-0.0047	0.0146	0.7469	Not significant	0.1063	0.0944	0.2603	Not significant	-0.0169	0.0058	0.003205	Significant	-0.0262	0.0189	0.1648	Not significant	0.0005	0.0044	0.9172	Not significant	1.0095	0.0343	0.7822	Not significant	1.0087	0.0108	0.419	Not significant
rs72926932	-0.0504	0.0226	0.02596	Significant	-0.0049	0.0139	0.7252	Not significant	-0.1999	0.0902	0.02661	Significant	0.0049	0.0055	0.3741	Not significant	-0.0595	0.018	0.0009602	Significant	0.0088	0.0042	0.03641	Significant	1.0019	0.0327	0.9532	Not significant	0.9824	0.0103	0.08394	Not significant
rs738408	-0.0607	0.0151	5.691e-05	Significant	-0.0274	0.0093	0.003107	Significant	0.0619	0.0601	0.3028	Not significant	-0.0161	0.0037	1.102e-05	Significant	-0.0411	0.012	0.0006233	Significant	-0.02	0.0028	1.404e-12	Significant	0.9696	0.022	0.1602	Not significant	0.9806	0.0069	0.004401	Significant
rs74653713	-0.0486	0.0335	0.1472	Significant	-0.0148	0.0206	0.4726	Not significant	0.0612	0.1334	0.6464	Not significant	-0.0151	0.0081	0.06277	Significant	-0.0292	0.0267	0.2741	Not significant	-0.0038	0.0063	0.539	Not significant	1.0035	0.0483	0.9429	Not significant	0.9839	0.0151	0.2822	Not significant
rs76011118	-0.0033	0.0384	0.932	Not significant	-0.0031	0.0236	0.8938	Not significant	0.1844	0.1528	0.2275	Not significant	-0.0088	0.0093	0.3464	Not significant	-0.0098	0.0305	0.749	Not significant	0.0011	0.0072	0.8809	Not significant	0.984	0.0557	0.7718	Not significant	0.9931	0.0174	0.6929	Not significant
rs7669833	-0.0289	0.0138	0.0362	Significant	-0.0018	0.0085	0.8308	Not significant	-0.0413	0.055	0.4521	Not significant	-0.0039	0.0033	0.2447	Not significant	0.0098	0.011	0.3712	Not significant	-0.0018	0.0026	0.4843	Not significant	0.9997	0.0199	0.9878	Not significant	1.0156	0.0063	0.01377	Significant
rs76895963	-0.2381	0.0482	7.736e-07	Significant	-0.0401	0.0296	0.1752	Not significant	0.629	0.192	0.00105	Significant	0.0661	0.0117	1.552e-08	Significant	0.0828	0.0383	0.03075	Significant	0.092	0.009	1.384e-24	Significant	1.0581	0.0711	0.4267	Not significant	0.9513	0.0216	0.02092	Significant
rs77464186	-0.0337	0.017	0.048	Significant	0.0254	0.0105	0.01527	Significant	-0.1503	0.0679	0.0268	Significant	-0.0012	0.0041	0.7647	Not significant	0.0069	0.0136	0.6126	Not significant	0.0016	0.0032	0.6211	Not significant	1.0001	0.0246	0.9981	Not significant	0.9832	0.0077	0.02809	Significant
rs7756992	-0.0509	0.0141	0.0003081	Significant	-0.0044	0.0087	0.6109	Not significant	0.1797	0.0562	0.0014	Significant	-0.0034	0.0034	0.3187	Not significant	-0.0125	0.0112	0.2641	Not significant	0.0131	0.0026	6.473e-07	Significant	1.0187	0.0202	0.3609	Not significant	1.0051	0.0064	0.4276	Not significant
rs78025551	0.0216	0.0178	0.2249	Not significant	-0.0096	0.0109	0.3775	Not significant	-0.0268	0.0708	0.7048	Not significant	-0.0149	0.0043	0.0005564	Significant	-0.0022	0.0141	0.8746	Not significant	0.0062	0.0033	0.06096	Significant	1.0872	0.0265	0.001587	Not significant	0.9932	0.0081	0.3992	Not significant
rs7903146	-0.0702	0.0137	3.078e-07	Significant	0.0043	0.0084	0.6069	Not significant	0.2046	0.0546	0.0001798	Significant	-0.0126	0.0033	0.0001463	Significant	-0.0025	0.0109	0.8165	Not significant	0.0078	0.0026	0.002183	Significant	1.0325	0.0196	0.1037	Not significant	0.9928	0.0062	0.2437	Not significant
rs79687284	-0.0031	0.034	0.9276	Not significant	-0.0084	0.0209	0.6863	Not significant	-0.1796	0.1354	0.1845	Not significant	0.0265	0.0082	0.001333	Significant	0.0173	0.027	0.5229	Not significant	0.02	0.0063	0.001586	Significant	0.9927	0.0492	0.8819	Not significant	0.9646	0.0155	0.02005	Significant
rs80147536	0.0269	0.0206	0.1926	Not significant	0.0177	0.0127	0.1636	Not significant	0.0263	0.0822	0.7492	Not significant	-0.0041	0.005	0.4111	Not significant	-0.0027	0.0164	0.8696	Not significant	0.0093	0.0039	0.01548	Significant	1.0299	0.0302	0.33	Not significant	0.992	0.0094	0.3878	Not significant
rs8037894	-0.0205	0.0126	0.1036	Significant	-0.01	0.0077	0.1943	Not significant	-0.0164	0.0501	0.7441	Not significant	-0.0082	0.0031	0.007204	Significant	-0.0227	0.01	0.02317	Significant	0.0002	0.0023	0.9452	Not significant	0.9796	0.0182	0.2572	Not significant	1.0005	0.0057	0.9282	Not significant
rs8107974	-0.0519	0.0235	0.02715	Significant	-0.0281	0.0144	0.05135	Not significant	0.2149	0.0936	0.02177	Significant	-0.1347	0.0057	2.773e-123	Significant	0.067	0.0187	0.0003359	Significant	-0.0993	0.0044	5.348e-114	Significant	1.0223	0.0335	0.5117	Not significant	0.9961	0.0107	0.7153	Not significant
rs862320	0.1167	0.0127	3.445e-20	Significant	0.0282	0.0078	0.0002931	Significant	0.1036	0.0505	0.04039	Significant	-0.0051	0.0031	0.09574	Not significant	0.0559	0.0101	3.063e-08	Significant	0.0187	0.0024	2.964e-15	Significant	1.0482	0.0184	0.01036	Not significant	1.0335	0.0058	1.034e-08	Significant
rs878521	-0.0245	0.0144	0.08852	Significant	0.0046	0.0088	0.6	Not significant	0.1308	0.0573	0.02245	Significant	0.0023	0.0035	0.5091	Not significant	0.005	0.0114	0.6627	Not significant	0.0175	0.0027	6.63e-11	Significant	0.9826	0.0208	0.3988	Not significant	0.9987	0.0065	0.8477	Not significant
rs9379084	-0.0405	0.0201	0.04398	Significant	-0.0103	0.0124	0.4049	Not significant	0.0136	0.0801	0.8649	Not significant	-0.003	0.0049	0.5358	Not significant	-0.0333	0.016	0.03701	Significant	-0.0119	0.0037	0.001549	Significant	0.9735	0.0287	0.3501	Not significant	0.9913	0.0091	0.3403	Not significant
rs9563615	0.0843	0.0136	6.449e-10	Significant	0.0069	0.0084	0.4084	Not significant	0.0438	0.0544	0.421	Not significant	-0.0037	0.0033	0.2587	Not significant	0.0039	0.0109	0.7215	Not significant	0.0059	0.0025	0.02066	Significant	1.0247	0.0198	0.2168	Not significant	0.9926	0.0062	0.232	Not significant
rs9569864	0.0914	0.0165	3.15e-08	Significant	0.0131	0.0101	0.1965	Not significant	-0.0659	0.0658	0.3162	Not significant	-0.0071	0.004	0.07703	Significant	0.0103	0.0131	0.4344	Not significant	0.0101	0.0031	0.001013	Significant	1.0513	0.0242	0.03854	Not significant	0.994	0.0075	0.4199	Not significant
rs9687832	-0.0103	0.0154	0.5016	Not significant	0.0176	0.0094	0.06221	Not significant	0.2785	0.0613	5.506e-06	Significant	0.0103	0.0037	0.005583	Significant	-0.0363	0.0122	0.003	Significant	0.0396	0.0029	2.562e-43	Significant	1.0131	0.0221	0.5554	Not significant	0.991	0.007	0.1939	Not significant
rs9860730	-0.0408	0.0138	0.003018	Significant	0.006	0.0085	0.4814	Not significant	-0.0375	0.0548	0.4937	Not significant	0.0009	0.0033	0.7929	Not significant	-0.0031	0.0109	0.777	Not significant	0.0071	0.0026	0.005826	Significant	1.034	0.02	0.09451	Not significant	1.006	0.0063	0.3383	Not significant
rs9873618	-0.0809	0.0137	3.887e-09	Significant	-0.0105	0.0084	0.2128	Not significant	-0.0112	0.0547	0.8385	Not significant	-0.0034	0.0033	0.3011	Not significant	-0.0442	0.0109	5.26e-05	Significant	-0.0106	0.0026	3.606e-05	Significant	1.0048	0.0198	0.8074	Not significant	0.9953	0.0062	0.4477	Not significant
Note. BMI= body mass index, SBP= systolic blood pressure, OR= odds ratio, BH-significance=Benjamini-Hochberg false discovery rate of 0.25.

## Sheet: HbA1c_SNPs_confounders
ESM Table 4 - Associations between 51 HbA1c SNPs and confounders
	BMI				Deprivation				SBP				Total cholesterol				CRP				Triglycerides				Stroke				Smoking
SNP	Beta	SE	P-value	BH-significance	Beta	SE	P-value	BH-significance	Beta	SE	P-value	BH-significance	Beta	SE	P-value	BH-significance	Beta	SE	P-value	BH-significance	Beta	SE	P-value	BH-significance	OR	SE	P-value	BH-significance	OR	SE	P-value	BH-significance
rs1046896	-0.0076	0.0135	0.5739	Not significant	-0.012	0.0083	0.1476	Not significant	-0.0325	0.0536	0.5444	Not significant	0.0042	0.0033	0.1941	Not significant	0.0121	0.0107	0.2583	Not significant	0.0077	0.0024	0.001472	Significant	1.0206	0.0193	0.2901	Not significant	0.9728	0.0057	1.073e-06	Significant
rs10774625	0.0443	0.0125	0.0003824	Significant	-0.026	0.0077	0.0006936	Significant	-0.4052	0.0497	3.466e-16	Significant	0.0321	0.003	3.24e-26	Significant	0.0112	0.0099	0.2601	Not significant	-0.0547	0.0024	2.011e-112	Significant	0.9211	0.018	4.776e-06	Significant	1.0297	0.008	0.0002428	Significant
rs10823343	-0.0096	0.0144	0.502	Not significant	0.0058	0.0088	0.5128	Not significant	0.0184	0.0572	0.7479	Not significant	0.0139	0.0035	6.46e-05	Significant	-0.0103	0.0114	0.366	Not significant	-0.0169	0.0029	3.609e-09	Significant	0.9538	0.0204	0.02065	Significant	1.023	0.007	0.001176	Significant
rs10830963	0.028	0.0139	0.04437	Significant	0.0037	0.0086	0.662	Not significant	0.1556	0.0555	0.005035	Significant	-0.0016	0.0034	0.6278	Not significant	-0.006	0.0111	0.5876	Not significant	-0.0017	0.0024	0.4687	Not significant	0.9903	0.0201	0.6268	Not significant	1.0189	0.0062	0.002427	Significant
rs11086054	0.0049	0.0136	0.7214	Not significant	0.0104	0.0084	0.2159	Not significant	-0.0169	0.0543	0.755	Not significant	0.0003	0.0033	0.9187	Not significant	0.0005	0.0109	0.9647	Not significant	0.0008	0.0027	0.7662	Not significant	1.0042	0.0197	0.8301	Not significant	0.9849	0.007	0.02953	Significant
rs11224302	0	0.021	0.9986	Not significant	-0.0191	0.0129	0.1387	Not significant	-0.0595	0.0838	0.4774	Not significant	0.0087	0.0051	0.08802	Significant	0.0151	0.0167	0.3662	Not significant	0.0019	0.0027	0.4909	Not significant	0.9876	0.0302	0.6801	Not significant	0.9833	0.0077	0.02994	Significant
rs11248914	0.0188	0.0133	0.1568	Not significant	0.0072	0.0081	0.3781	Not significant	0.0447	0.0528	0.3972	Not significant	0.0022	0.0032	0.4913	Not significant	0.0044	0.0105	0.675	Not significant	0.004	0.0023	0.09025	Significant	0.9844	0.0191	0.4083	Not significant	1.0126	0.0058	0.03061	Significant
rs11558471	-0.0389	0.0134	0.003649	Significant	-0.0057	0.0082	0.4897	Not significant	-0.0376	0.0533	0.4808	Not significant	0.0061	0.0032	0.06168	Significant	-0.0172	0.0106	0.1057	Not significant	0.0137	0.003	6.43e-06	Significant	0.9643	0.0192	0.05769	Not significant	0.9886	0.0058	0.04958	Not significant
rs11603334	-0.035	0.0171	0.04105	Significant	0.0257	0.0105	0.01452	Significant	-0.1692	0.0682	0.01306	Significant	-0.0009	0.0042	0.82	Not significant	0.0053	0.0136	0.6953	Not significant	0.0007	0.0032	0.823	Not significant	0.996	0.0247	0.8711	Not significant	0.9881	0.0061	0.05044	Not significant
rs11619319	-0.0149	0.015	0.3215	Not significant	0.0123	0.0092	0.1827	Not significant	0.1381	0.0599	0.02117	Significant	0.0029	0.0037	0.4212	Not significant	-0.0057	0.012	0.6311	Not significant	-0.0021	0.0035	0.5575	Not significant	0.9921	0.0217	0.7139	Not significant	1.0104	0.0057	0.0671	Not significant
rs11708067	-0.0359	0.0145	0.01314	Significant	-0.0164	0.0089	0.06551	Significant	-0.1232	0.0576	0.0324	Significant	0.0084	0.0035	0.01726	Significant	-0.0377	0.0115	0.001037	Significant	0.0031	0.0025	0.2103	Not significant	1.0153	0.0209	0.4688	Not significant	0.989	0.0063	0.08127	Not significant
rs11964178	0.0126	0.0126	0.3162	Not significant	0.0075	0.0077	0.3329	Not significant	0.153	0.0502	0.0023	Significant	-0.0004	0.0031	0.8854	Not significant	0.0241	0.01	0.01591	Significant	0.009	0.0028	0.00127	Significant	1.0215	0.0182	0.241	Not significant	0.9904	0.0057	0.08893	Not significant
rs12621844	-0.0131	0.0128	0.3081	Not significant	-0.0141	0.0079	0.07282	Significant	-0.0322	0.0511	0.5288	Not significant	-0.0005	0.0031	0.8793	Not significant	-0.0015	0.0102	0.885	Not significant	-0.0034	0.0039	0.3891	Not significant	0.9908	0.0185	0.6174	Not significant	0.9911	0.0057	0.1137	Not significant
rs13134327	0.0198	0.0134	0.1398	Not significant	0.0209	0.0082	0.01091	Significant	-0.0459	0.0534	0.3898	Not significant	0.004	0.0033	0.2223	Not significant	-0.002	0.0106	0.8491	Not significant	0.0131	0.0026	6.473e-07	Significant	1.0443	0.0191	0.0235	Significant	1.0084	0.006	0.1647	Not significant
rs1467311	0.0077	0.0132	0.5586	Not significant	0.0044	0.0081	0.591	Not significant	-0.152	0.0526	0.003892	Significant	0.0071	0.0032	0.02694	Significant	-0.0208	0.0105	0.0475	Significant	0.0019	0.0029	0.5141	Not significant	0.9928	0.0191	0.706	Not significant	1.0083	0.0061	0.1713	Not significant
rs1558902	0.3491	0.0127	2.254e-166	Significant	-0.012	0.0078	0.1227	Not significant	0.2014	0.0506	6.903e-05	Significant	-0.0143	0.0031	3.711e-06	Significant	0.0534	0.0101	1.285e-07	Significant	0.0068	0.0024	0.004077	Significant	1.0176	0.0183	0.34	Not significant	0.9896	0.0078	0.1803	Not significant
rs174577	-0.0489	0.013	0.0001755	Significant	-0.0291	0.008	0.0002685	Significant	0.0291	0.0519	0.5744	Not significant	0.0535	0.0032	2.729e-64	Significant	0.0381	0.0104	0.0002394	Significant	0.0032	0.0028	0.2563	Not significant	1.0131	0.0188	0.4882	Not significant	1.0083	0.0068	0.2267	Not significant
rs17509001	-0.0104	0.0176	0.557	Not significant	0.0223	0.0108	0.0394	Significant	-0.0257	0.0703	0.714	Not significant	0.0069	0.0043	0.1073	Significant	0.0123	0.014	0.3796	Not significant	-0.011	0.0026	1.786e-05	Significant	0.9615	0.0258	0.1283	Not significant	0.9856	0.0122	0.2339	Not significant
rs17533903	0.0117	0.0155	0.4516	Not significant	-0.0035	0.0095	0.7127	Not significant	-0.0808	0.0618	0.191	Not significant	0.0106	0.0038	0.004884	Significant	0.003	0.0123	0.808	Not significant	0.0047	0.005	0.3555	Not significant	1.0123	0.0222	0.5836	Not significant	0.9929	0.0062	0.2519	Not significant
rs17747324	-0.0626	0.0149	2.743e-05	Significant	-0.0047	0.0092	0.6075	Not significant	0.1759	0.0594	0.003077	Significant	-0.0127	0.0036	0.0004384	Significant	-0.0019	0.0119	0.874	Not significant	0.0108	0.0025	1.38e-05	Significant	1.0377	0.0213	0.08239	Not significant	0.9935	0.0057	0.2529	Not significant
rs1800562	0.0444	0.0233	0.05668	Significant	-0.0296	0.0143	0.03864	Significant	0.0433	0.0928	0.6406	Not significant	0.0607	0.0057	6.724e-27	Significant	-0.0858	0.0184	3.263e-06	Significant	-0.0008	0.0033	0.8017	Not significant	1.0067	0.0335	0.8418	Not significant	1.0065	0.0057	0.2592	Not significant
rs198846	-0.0003	0.0172	0.9871	Not significant	-0.0074	0.0105	0.4853	Not significant	-0.3681	0.0684	7.394e-08	Significant	0.0181	0.0042	1.36e-05	Significant	-0.0313	0.0137	0.02192	Significant	0.0272	0.0027	1.139e-24	Significant	0.9447	0.0243	0.01936	Significant	0.9943	0.0066	0.3868	Not significant
rs2110073	0.0009	0.0219	0.9659	Not significant	-0.0134	0.0135	0.3193	Not significant	-0.1558	0.0872	0.07416	Significant	-0.0031	0.0053	0.5649	Not significant	-0.0178	0.0174	0.3068	Not significant	-0.0011	0.0027	0.6861	Not significant	0.9906	0.0317	0.767	Not significant	0.9943	0.0068	0.3996	Not significant
rs2191349	0.0139	0.0125	0.2673	Not significant	0.0026	0.0077	0.7364	Not significant	-0.0027	0.0499	0.9567	Not significant	0.0028	0.003	0.3482	Not significant	0.0016	0.01	0.8721	Not significant	-0.0012	0.0025	0.6391	Not significant	1.0057	0.0181	0.7544	Not significant	1.0071	0.0086	0.4136	Not significant
rs2375278	0.0187	0.0168	0.2658	Not significant	-0.0053	0.0103	0.6103	Not significant	0.0961	0.0669	0.1508	Not significant	0.0193	0.0041	2.117e-06	Significant	-0.0088	0.0134	0.511	Not significant	-0.009	0.0032	0.004745	Significant	1.0229	0.024	0.346	Not significant	1.0048	0.0059	0.4139	Not significant
rs2383208	-0.0311	0.0162	0.05529	Significant	0.0047	0.01	0.6401	Not significant	0.036	0.0646	0.5778	Not significant	0.0037	0.0039	0.3501	Not significant	0.0063	0.0129	0.6271	Not significant	-0.0013	0.0025	0.5934	Not significant	1.0074	0.0235	0.7523	Not significant	1.0051	0.0064	0.4276	Not significant
rs2408955	0.0074	0.0125	0.5541	Not significant	0.0212	0.0077	0.005782	Significant	0.0289	0.0497	0.561	Not significant	0.0003	0.003	0.9096	Not significant	-0.0048	0.0099	0.6305	Not significant	0.0095	0.003	0.001766	Significant	0.9818	0.018	0.3072	Not significant	0.9941	0.0076	0.4402	Not significant
rs267738	0.0088	0.015	0.5578	Not significant	-0.0096	0.0092	0.2975	Not significant	-0.0742	0.0599	0.2152	Not significant	0.0007	0.0036	0.8524	Not significant	0.0151	0.0119	0.2071	Not significant	-0.0017	0.0043	0.6868	Not significant	0.9938	0.0216	0.7734	Not significant	1.0045	0.0059	0.4432	Not significant
rs282587	0.014	0.019	0.4612	Not significant	-0.0098	0.0117	0.3991	Not significant	0.0644	0.0757	0.3943	Not significant	-0.0027	0.0046	0.5622	Not significant	-0.0074	0.0151	0.6254	Not significant	-0.0001	0.0031	0.9725	Not significant	0.9993	0.0273	0.9794	Not significant	1.0043	0.0066	0.5128	Not significant
rs3782123	-0.0076	0.0142	0.5896	Not significant	-0.006	0.0087	0.4923	Not significant	-0.0273	0.0564	0.628	Not significant	0.0047	0.0034	0.1727	Not significant	-0.0152	0.0113	0.1766	Not significant	0.0112	0.0026	1.718e-05	Significant	1.0328	0.0202	0.1105	Not significant	0.9911	0.0148	0.5468	Not significant
rs3824065	0.0101	0.0126	0.4224	Not significant	0.0091	0.0077	0.2414	Not significant	0.1546	0.0502	0.00208	Significant	-0.0076	0.0031	0.01351	Significant	0.0028	0.01	0.7802	Not significant	0.0102	0.0031	0.001131	Significant	0.979	0.0181	0.2407	Not significant	1.0037	0.0061	0.5482	Not significant
rs4607517	-0.0219	0.0163	0.1796	Not significant	0.0093	0.01	0.3539	Not significant	0.1588	0.0649	0.01441	Significant	-0.0024	0.004	0.5449	Not significant	-0.004	0.013	0.7564	Not significant	-0.0007	0.0026	0.7763	Not significant	0.9952	0.0235	0.8393	Not significant	1.0035	0.006	0.5563	Not significant
rs4737009	-0.0027	0.0147	0.8536	Not significant	-0.0048	0.009	0.5903	Not significant	0.0394	0.0584	0.4998	Not significant	0.0076	0.0036	0.03189	Significant	-0.0066	0.0117	0.5729	Not significant	0.0047	0.0024	0.04785	Significant	1.0178	0.021	0.4024	Not significant	0.9967	0.0064	0.6021	Not significant
rs4745982	0.0087	0.0237	0.712	Not significant	0.0177	0.0146	0.2234	Not significant	0.0183	0.0944	0.8459	Not significant	0.0264	0.0057	4.267e-06	Significant	-0.0207	0.0189	0.2724	Not significant	-0.004	0.0044	0.3616	Not significant	0.9822	0.0339	0.5961	Not significant	0.9969	0.007	0.6553	Not significant
rs4783565	0.0039	0.0139	0.7811	Not significant	-0.0203	0.0086	0.018	Significant	-0.0024	0.0556	0.9658	Not significant	0.0068	0.0034	0.04491	Significant	-0.017	0.0111	0.1263	Not significant	0.003	0.0023	0.2046	Not significant	0.9849	0.0202	0.4508	Not significant	0.9975	0.0057	0.6643	Not significant
rs4820268	-0.0098	0.0125	0.4326	Not significant	-0.0211	0.0077	0.005818	Significant	0.114	0.0497	0.02186	Significant	0.0059	0.003	0.05067	Significant	-0.0111	0.0099	0.2624	Not significant	0.0029	0.0025	0.2518	Not significant	1.0131	0.018	0.471	Not significant	0.9973	0.0062	0.6654	Not significant
rs4894799	-0.0076	0.0129	0.5531	Not significant	-0.0067	0.0079	0.3999	Not significant	0.0212	0.0514	0.6796	Not significant	0.0008	0.0031	0.8047	Not significant	-0.0109	0.0103	0.2891	Not significant	-0.0012	0.0025	0.6205	Not significant	0.9942	0.0186	0.7526	Not significant	1.0029	0.0067	0.6671	Not significant
rs560887	-0.0037	0.0136	0.7832	Not significant	0.0077	0.0083	0.3555	Not significant	0.1567	0.0541	0.003754	Significant	0.0043	0.0033	0.1926	Not significant	0.0234	0.0108	0.03053	Significant	-0.0058	0.0023	0.01281	Significant	1.0184	0.0196	0.3543	Not significant	0.9972	0.0065	0.6725	Not significant
rs579459	0.0056	0.0153	0.7165	Not significant	-0.027	0.0094	0.00419	Significant	-0.0195	0.061	0.7494	Not significant	0.0578	0.0037	1.853e-54	Significant	0.0552	0.0122	5.939e-06	Significant	0.0276	0.0023	2.658e-32	Significant	1.0731	0.0217	0.001129	Significant	0.996	0.0099	0.6876	Not significant
rs592423	-0.003	0.0125	0.8131	Not significant	-0.0138	0.0077	0.0732	Significant	0.0908	0.0499	0.06857	Significant	0.0079	0.003	0.009205	Significant	-0.0269	0.01	0.006956	Significant	0.002	0.0061	0.7369	Not significant	1.005	0.018	0.7811	Not significant	1.0028	0.0074	0.6996	Not significant
rs6474359	0.0538	0.0326	0.09867	Not significant	-0.0111	0.02	0.5804	Not significant	0.0525	0.1298	0.6859	Not significant	0.0308	0.0079	9.952e-05	Significant	-0.0164	0.026	0.5273	Not significant	0.0027	0.0025	0.2721	Not significant	0.9737	0.0466	0.5675	Not significant	1.0036	0.0096	0.7088	Not significant
rs6980507	0.0204	0.0128	0.1095	Not significant	0.0008	0.0078	0.919	Not significant	0.1211	0.0508	0.01719	Significant	-0.0009	0.0031	0.7677	Not significant	0.0313	0.0101	0.002053	Significant	0.0017	0.0023	0.4773	Not significant	1.0081	0.0184	0.6606	Not significant	1.004	0.0108	0.7102	Not significant
rs7040409	-0.0163	0.0269	0.5457	Not significant	0.0159	0.0166	0.3361	Not significant	-0.052	0.1073	0.6283	Not significant	0.0138	0.0065	0.03452	Significant	-0.0121	0.0215	0.5722	Not significant	0.0009	0.0029	0.7603	Not significant	1.0096	0.0391	0.8068	Not significant	1.0021	0.0057	0.7124	Not significant
rs7616006	-0.0171	0.0126	0.1767	Not significant	-0.0048	0.0078	0.5321	Not significant	0.0781	0.0503	0.1208	Not significant	0.0221	0.0031	5.914e-13	Significant	0.0112	0.01	0.263	Not significant	-0.002	0.0028	0.4766	Not significant	0.9919	0.0182	0.6535	Not significant	1.002	0.0058	0.735	Not significant
rs7756992	-0.0509	0.0141	0.0003081	Significant	-0.0044	0.0087	0.6109	Not significant	0.1797	0.0562	0.0014	Significant	-0.0034	0.0034	0.3187	Not significant	-0.0125	0.0112	0.2641	Not significant	0.0047	0.0023	0.04293	Significant	1.0187	0.0202	0.3609	Not significant	1.003	0.0106	0.7798	Not significant
rs8192675	-0.0868	0.0137	2.673e-10	Significant	-0.012	0.0084	0.1548	Not significant	-0.0028	0.0547	0.9591	Not significant	-0.0034	0.0033	0.3033	Not significant	-0.0424	0.0109	0.0001056	Significant	0.0007	0.0023	0.7661	Not significant	1.0044	0.0198	0.8259	Not significant	0.9988	0.0057	0.8394	Not significant
rs837763	0.0238	0.0125	0.05704	Significant	-0.0143	0.0077	0.06318	Significant	0.0556	0.0499	0.2646	Not significant	0.0054	0.003	0.07477	Significant	0.0075	0.01	0.4493	Not significant	-0.0098	0.0023	2.551e-05	Significant	1.0243	0.0181	0.185	Not significant	0.9992	0.0075	0.9123	Not significant
rs857691	0.0136	0.0145	0.3492	Not significant	-0.0088	0.0089	0.325	Not significant	-0.0107	0.0577	0.8534	Not significant	0.0095	0.0035	0.007182	Significant	-0.0082	0.0115	0.4755	Not significant	0.0042	0.0026	0.1122	Not significant	0.9828	0.021	0.4089	Not significant	0.9992	0.0074	0.9149	Not significant
rs9604573	-0.004	0.0143	0.7778	Not significant	0.0033	0.0088	0.7095	Not significant	0.0774	0.0568	0.1729	Not significant	0.0284	0.0035	2.375e-16	Significant	-0.0014	0.0113	0.9019	Not significant	0.0002	0.0027	0.9351	Not significant	0.9985	0.0205	0.9431	Not significant	0.9993	0.0068	0.9228	Not significant
rs9818758	-0.0357	0.0166	0.03115	Significant	0.0027	0.0102	0.7939	Not significant	-0.0099	0.066	0.8813	Not significant	0.0071	0.004	0.07633	Significant	-0.0119	0.0132	0.366	Not significant	-0.0062	0.0041	0.1265	Not significant	1.0193	0.0238	0.4212	Not significant	1.0002	0.0065	0.9787	Not significant
rs9914988	0.0293	0.0154	0.05764	Significant	0.0201	0.0095	0.03442	Significant	0.1202	0.0615	0.05065	Significant	0.0127	0.0037	0.0007258	Significant	-0.0172	0.0123	0.1606	Not significant	0.0032	0.0024	0.1838	Not significant	1.0179	0.0224	0.4281	Not significant	0.9999	0.0063	0.9851	Not significant
Note. BMI= body mass index, SBP= systolic blood pressure, OR= odds ratio, BH-significance=Benjamini-Hochberg false discovery rate of 0.25.

## Sheet: RT_SNPs_confounders
ESM Table 4 - Associations between RT SNPs and confounders
	BMI				Deprivation				SBP				Total cholesterol				CRP				Triglycerides				Stroke				Smoking
SNP	Beta	SE	P-value	BH-significance	Beta	SE	P-value	BH-significance	Beta	SE	P-value	BH-significance	Beta	SE	P-value	BH-significance	Beta	SE	P-value	BH-significance	Beta	SE	P-value	BH-significance	OR	SE	P-value	BH-significance	OR	SE	P-value	BH-significance
rs10125715	-0.0247	0.0142	0.0811	Significant	-0.0176	0.0087	0.04285	Significant	-0.0012	0.0565	0.9832	Not significant	0.0008	0.0034	0.8213	Not significant	-0.012	0.0113	0.2886	Not significant	-0.0185	0.0026	2.771e-12	Significant	1.0022	0.0205	0.9133	Not significant	0.9905	0.0064	0.1377	Significant
rs1032501	-0.0079	0.0128	0.5373	Not significant	-0.0108	0.0078	0.1707	Not significant	0.0401	0.0509	0.4305	Not significant	0.0027	0.0031	0.3834	Not significant	-0.0132	0.0102	0.1951	Not significant	-0.0049	0.0024	0.04149	Significant	0.998	0.0184	0.9146	Not significant	1.0055	0.0058	0.3471	Not significant
rs1054442	0.0383	0.0129	0.003004	Significant	0.0038	0.0079	0.6336	Not significant	-0.0318	0.0514	0.5351	Not significant	0.0008	0.0031	0.801	Not significant	0.0177	0.0102	0.08469	Not significant	-0.0049	0.0024	0.04131	Significant	1.0045	0.0186	0.8076	Not significant	0.9935	0.0059	0.2687	Not significant
rs10775404	0.0224	0.016	0.1633	Not significant	0.0109	0.0099	0.2683	Not significant	0.2466	0.0639	0.000114	Significant	-0.0053	0.0039	0.172	Not significant	-0.0047	0.0128	0.7119	Not significant	-0.0023	0.003	0.4328	Not significant	1.0139	0.023	0.5478	Not significant	1.0118	0.0073	0.1063	Significant
rs10804171	0.0218	0.0248	0.3792	Not significant	0.0095	0.0152	0.5347	Not significant	0.2174	0.0987	0.02766	Significant	-0.0019	0.006	0.7509	Not significant	0.0498	0.0198	0.01165	Not significant	0.0005	0.0046	0.9102	Not significant	0.9916	0.0358	0.8147	Not significant	1.0249	0.0113	0.02939	Significant
rs10911301	0.0038	0.0125	0.7601	Not significant	0.0057	0.0077	0.456	Not significant	0.0459	0.0499	0.3578	Not significant	0.0005	0.003	0.8745	Not significant	-0.0053	0.01	0.5934	Not significant	0.0048	0.0023	0.04173	Significant	0.971	0.0181	0.1035	Not significant	1.0062	0.0057	0.2762	Not significant
rs11205668	-0.0659	0.0126	1.59e-07	Significant	-0.0194	0.0077	0.01184	Significant	-0.1104	0.0501	0.02754	Significant	0.0011	0.0031	0.7145	Not significant	-0.0018	0.01	0.8562	Not significant	-0.0026	0.0023	0.2636	Not significant	1.0345	0.0182	0.06206	Not significant	0.9824	0.0057	0.001813	Significant
rs13219424	0.0099	0.0136	0.4687	Not significant	0.0002	0.0084	0.9789	Not significant	-0.0627	0.0542	0.2473	Not significant	0.0018	0.0033	0.577	Not significant	-0.0044	0.0108	0.6856	Not significant	0.0039	0.0025	0.1195	Not significant	0.9875	0.0196	0.5212	Not significant	0.9921	0.0062	0.1975	Not significant
rs1351848	-0.0042	0.0126	0.7372	Not significant	0.007	0.0077	0.3632	Not significant	-0.0639	0.0502	0.2023	Not significant	-0.0057	0.0031	0.06085	Not significant	-0.0116	0.01	0.246	Not significant	0	0.0023	0.9905	Not significant	1.0122	0.0182	0.5035	Not significant	1.0046	0.0057	0.4248	Not significant
rs1385253	-0.0236	0.015	0.1161	Significant	-0.0108	0.0092	0.2415	Not significant	-0.0629	0.0597	0.292	Not significant	-0.0003	0.0036	0.9304	Not significant	0.0078	0.0119	0.514	Not significant	-0.0009	0.0028	0.7566	Not significant	1.0002	0.0216	0.9943	Not significant	1.007	0.0068	0.3087	Not significant
rs1503043	0.0197	0.0132	0.134	Not significant	0.0162	0.0081	0.04492	Significant	0.0907	0.0524	0.08351	Significant	-0.0026	0.0032	0.4208	Not significant	0.0089	0.0105	0.3965	Not significant	0.0061	0.0025	0.0132	Significant	0.9954	0.019	0.8062	Not significant	1.0211	0.006	0.000467	Significant
rs16822665	-0.0147	0.0136	0.2799	Not significant	-0.0109	0.0083	0.1898	Not significant	-0.0744	0.0541	0.1692	Not significant	0.0033	0.0033	0.3107	Not significant	0.017	0.0108	0.1149	Not significant	0.002	0.0025	0.4217	Not significant	1.0037	0.0196	0.8502	Not significant	0.9816	0.0062	0.002549	Significant
rs16959783	0.0283	0.0148	0.05539	Significant	-0.0245	0.0091	0.007002	Significant	0.1083	0.0588	0.06559	Significant	-0.0068	0.0036	0.05881	Not significant	-0.005	0.0117	0.6705	Not significant	0.0039	0.0028	0.1583	Not significant	1.0064	0.0212	0.7634	Not significant	0.988	0.0067	0.07227	Significant
rs1734197	-0.0201	0.0125	0.1074	Significant	0.0187	0.0077	0.0148	Significant	0.0344	0.0498	0.4895	Not significant	0.0051	0.003	0.09173	Not significant	-0.0169	0.0099	0.08892	Not significant	-0.0031	0.0023	0.1785	Not significant	0.9835	0.018	0.3561	Not significant	1.0092	0.0057	0.1057	Significant
rs2040879	-0.0191	0.0165	0.2455	Not significant	0.0072	0.0101	0.4783	Not significant	-0.0034	0.0657	0.9593	Not significant	0.0022	0.004	0.5846	Not significant	-0.0123	0.0131	0.3475	Not significant	0.0061	0.0031	0.04601	Significant	1.009	0.0239	0.7081	Not significant	1.0029	0.0075	0.7014	Not significant
rs2604268	0.0274	0.0142	0.05389	Significant	0.0198	0.0087	0.02347	Significant	-0.0771	0.0566	0.1728	Not significant	-0.0065	0.0034	0.06014	Not significant	0.0092	0.0113	0.4167	Not significant	0.0009	0.0026	0.7465	Not significant	0.9583	0.0202	0.03553	Not significant	0.9834	0.0064	0.009236	Significant
rs264979	-0.0679	0.0125	5.438e-08	Significant	-0.0096	0.0077	0.2104	Not significant	0.0509	0.0498	0.3061	Not significant	0	0.003	0.9965	Not significant	-0.0153	0.0099	0.1248	Not significant	-0.0038	0.0023	0.09895	Not significant	0.9837	0.018	0.3611	Not significant	0.9672	0.0057	4.282e-09	Significant
rs2869529	0.0014	0.0129	0.9161	Not significant	-0.011	0.0079	0.1645	Not significant	-0.0624	0.0513	0.2242	Not significant	0.0055	0.0031	0.07916	Not significant	0.0069	0.0102	0.5005	Not significant	0.0034	0.0024	0.1579	Not significant	0.9898	0.0186	0.5803	Not significant	1.009	0.0058	0.1269	Significant
rs323299	0.0217	0.0131	0.09672	Significant	0.0024	0.008	0.7612	Not significant	0.0216	0.052	0.6775	Not significant	0.0044	0.0032	0.165	Not significant	-0.0065	0.0104	0.5292	Not significant	0.0032	0.0024	0.1928	Not significant	1.012	0.0188	0.527	Not significant	1.0207	0.0059	0.0005393	Significant
rs35066740	-0.0397	0.0157	0.01135	Significant	0.0046	0.0096	0.6308	Not significant	-0.161	0.0624	0.009897	Significant	0.0021	0.0038	0.5878	Not significant	-0.0257	0.0125	0.03931	Not significant	-0.003	0.0029	0.2993	Not significant	0.9583	0.0229	0.06227	Not significant	0.9784	0.0071	0.002144	Significant
rs4627212	-0.0395	0.0138	0.004249	Significant	-0.0084	0.0085	0.3206	Not significant	0.0287	0.055	0.6018	Not significant	0.0025	0.0034	0.4539	Not significant	0.001	0.011	0.9285	Not significant	-0.0046	0.0026	0.07484	Not significant	0.9755	0.02	0.2154	Not significant	1.0121	0.0063	0.0556	Significant
rs4673905	-0.0075	0.0133	0.5714	Not significant	0.0233	0.0082	0.004477	Significant	0.0804	0.0531	0.1299	Not significant	-0.0007	0.0032	0.8238	Not significant	0.0162	0.0106	0.1253	Not significant	0.0002	0.0025	0.9358	Not significant	1.0414	0.0191	0.03346	Not significant	1.0021	0.006	0.7281	Not significant
rs4852778	0.024	0.0126	0.05673	Significant	0.0051	0.0077	0.5112	Not significant	-0.1276	0.0502	0.01109	Significant	0.0056	0.0031	0.06573	Not significant	-0.0093	0.01	0.3557	Not significant	0.0013	0.0023	0.5745	Not significant	0.9935	0.0182	0.7209	Not significant	1.0088	0.0057	0.1269	Significant
rs4946935	0.0907	0.0139	7.114e-11	Significant	-0.0042	0.0085	0.6239	Not significant	-0.1806	0.0554	0.001117	Significant	-0.0031	0.0034	0.3562	Not significant	0.0115	0.0111	0.2968	Not significant	0.0041	0.0026	0.1145	Not significant	0.985	0.02	0.4498	Not significant	1.0165	0.0063	0.009544	Significant
rs56335290	0.0608	0.015	5.284e-05	Significant	0.0129	0.0092	0.1624	Not significant	0.1079	0.0599	0.07175	Significant	0.0065	0.0036	0.07694	Not significant	0.0205	0.012	0.08573	Not significant	0.0068	0.0028	0.01469	Significant	1.0337	0.0215	0.1225	Not significant	1.0015	0.0068	0.83	Not significant
rs568039055	0.0175	0.0176	0.3222	Not significant	0.0045	0.0108	0.6803	Not significant	0.2635	0.0702	0.0001763	Significant	-0.0034	0.0043	0.4321	Not significant	0.0046	0.014	0.7426	Not significant	-0.0031	0.0033	0.3462	Not significant	1.0192	0.0253	0.4529	Not significant	1.0214	0.008	0.007995	Significant
rs58984824	0.0014	0.0172	0.9367	Not significant	-0.0172	0.0106	0.1052	Not significant	0.179	0.0687	0.009134	Significant	0.0047	0.0042	0.2643	Not significant	0.0087	0.0137	0.5231	Not significant	-0.0042	0.0032	0.1876	Not significant	0.9814	0.025	0.4528	Not significant	1.0154	0.0078	0.04991	Significant
rs61786416	-0.0048	0.021	0.8205	Not significant	0.0057	0.0129	0.6576	Not significant	-0.1208	0.0837	0.1486	Not significant	0.007	0.0051	0.1675	Not significant	0.0001	0.0167	0.9939	Not significant	-0.0039	0.0039	0.3221	Not significant	1.0029	0.0302	0.9227	Not significant	1.0008	0.0095	0.9352	Not significant
rs62074125	-0.0404	0.0143	0.004685	Significant	0.0045	0.0088	0.6094	Not significant	-0.0038	0.0569	0.9466	Not significant	0.0019	0.0035	0.5836	Not significant	-0.0135	0.0114	0.2356	Not significant	-0.0057	0.0027	0.03355	Significant	0.9826	0.0207	0.3961	Not significant	0.9972	0.0065	0.6686	Not significant
rs648997	0.0236	0.0145	0.1038	Significant	-0.009	0.0089	0.3126	Not significant	-0.4044	0.0577	2.481e-12	Significant	0.0262	0.0035	9.342e-14	Significant	-0.0017	0.0115	0.8814	Not significant	-0.0073	0.0027	0.006952	Significant	0.9486	0.0212	0.01264	Not significant	0.9847	0.0066	0.01926	Significant
rs66534382	-0.1245	0.0158	2.956e-15	Significant	-0.0406	0.0097	2.838e-05	Significant	-0.2149	0.0628	0.0006266	Significant	0.0118	0.0038	0.002007	Significant	-0.0041	0.0126	0.7447	Not significant	-0.0048	0.0029	0.1005	Not significant	0.9563	0.0231	0.05278	Not significant	0.986	0.0072	0.04902	Significant
rs6870103	0.0511	0.0125	4.717e-05	Significant	-0.0031	0.0077	0.6839	Not significant	0.0354	0.05	0.4787	Not significant	0.0106	0.003	0.0005051	Significant	-0.0108	0.01	0.2786	Not significant	-0.0006	0.0023	0.8064	Not significant	1.0129	0.0181	0.4786	Not significant	1.0076	0.0057	0.1853	Not significant
rs7075591	0.0084	0.0131	0.5195	Not significant	-0.0195	0.008	0.0152	Significant	0.0683	0.0521	0.1898	Not significant	-0.0045	0.0032	0.1601	Not significant	0.0087	0.0104	0.4035	Not significant	0.0075	0.0024	0.002138	Significant	1.0303	0.0187	0.1113	Not significant	0.9831	0.0059	0.004024	Significant
rs73464507	-0.016	0.017	0.3457	Not significant	-0.0095	0.0104	0.3624	Not significant	0.0886	0.0677	0.1903	Not significant	0.0011	0.0041	0.7961	Not significant	-0.0107	0.0135	0.428	Not significant	-0.0012	0.0032	0.7041	Not significant	0.9949	0.0246	0.835	Not significant	1.0094	0.0077	0.2251	Not significant
rs75543711	-0.0396	0.0226	0.08024	Significant	-0.0009	0.0139	0.9489	Not significant	-0.1399	0.0901	0.1205	Not significant	-0.0038	0.0055	0.4938	Not significant	0.0093	0.018	0.6066	Not significant	-0.0064	0.0042	0.1306	Not significant	1.061	0.0318	0.06268	Not significant	1.0065	0.0103	0.5265	Not significant
rs7598246	0.0537	0.0127	2.218e-05	Significant	-0.0047	0.0078	0.5483	Not significant	0.1424	0.0504	0.004763	Significant	-0.0011	0.0031	0.7125	Not significant	0.0189	0.0101	0.06048	Not significant	0.0004	0.0024	0.8774	Not significant	0.9825	0.0183	0.3336	Not significant	1.0139	0.0058	0.01621	Significant
rs7783359	-0.0103	0.013	0.4289	Not significant	0.0038	0.008	0.6374	Not significant	0.0223	0.0519	0.6677	Not significant	-0.0054	0.0032	0.08823	Not significant	0.0075	0.0104	0.468	Not significant	-0.0033	0.0024	0.1739	Not significant	1.0125	0.0188	0.5094	Not significant	1.0089	0.0059	0.1358	Significant
rs77917390	-0.0016	0.0211	0.9388	Not significant	-0.0364	0.0129	0.004864	Significant	0.3043	0.0839	0.0002874	Significant	0.0006	0.0051	0.9131	Not significant	-0.0512	0.0167	0.002247	Significant	-0.0032	0.0039	0.4147	Not significant	1.0254	0.0301	0.4047	Not significant	0.9792	0.0096	0.02842	Significant
rs77998199	0.0273	0.0158	0.08363	Significant	-0.0003	0.0097	0.979	Not significant	0.16	0.0628	0.01087	Significant	0.0017	0.0038	0.6607	Not significant	0.005	0.0126	0.6916	Not significant	0.0015	0.0029	0.6159	Not significant	0.9635	0.023	0.1057	Not significant	0.9664	0.0072	1.978e-06	Significant
rs7936413	0.0544	0.0166	0.001024	Significant	-0.0013	0.0102	0.8999	Not significant	-0.0159	0.066	0.8097	Not significant	-0.0194	0.004	1.34e-06	Significant	0.0097	0.0132	0.4604	Not significant	-0.0012	0.0031	0.6984	Not significant	1.0298	0.0237	0.2144	Not significant	1.0273	0.0075	0.0003185	Significant
rs80054135	0.0002	0.0281	0.9942	Not significant	-0.0415	0.0173	0.01618	Significant	-0.1721	0.112	0.1244	Not significant	0.0062	0.0068	0.3654	Not significant	-0.0069	0.0224	0.7561	Not significant	0.0037	0.0052	0.4847	Not significant	0.9191	0.042	0.04471	Not significant	0.9751	0.0128	0.04881	Significant
rs925229	-0.0095	0.0126	0.4526	Not significant	0.007	0.0077	0.3671	Not significant	-0.0809	0.0502	0.1069	Not significant	-0.0089	0.0031	0.00349	Significant	-0.0118	0.01	0.2403	Not significant	-0.0024	0.0023	0.3017	Not significant	1.0213	0.0181	0.2447	Not significant	0.9993	0.0057	0.9094	Not significant
rs936414	-0.0052	0.0139	0.7075	Not significant	-0.0093	0.0086	0.2761	Not significant	-0.0447	0.0555	0.4203	Not significant	-0.0007	0.0034	0.8329	Not significant	0.013	0.0111	0.2429	Not significant	-0.0038	0.0026	0.1442	Not significant	0.9741	0.0202	0.195	Not significant	0.9703	0.0063	1.907e-06	Significant
Note. BMI= body mass index, SBP= systolic blood pressure, OR= odds ratio, BH-significance=Benjamini-Hochberg false discovery rate of 0.25.

## Sheet: ICD-10 AD codes
ESM Table 6 - ICD-10 codes for Alzheimer's disease (AD) in UK Biobank
ICD-10 code	ICD-10 Code Text
F00	Dementia in Alzheimer's disease
F00.0	Dementia in Alzheimer's disease with early onset
F00.1	Dementia in Alzheimer's disease with late onset
F00.2	Dementia in Alzheimer's disease, atypical or mixed type
F00.9	Dementia in Alzheimer's disease, unspecified
G30	Alzheimer's disease
G30.0	Alzheimer's disease with early onset
G30.1	Alzheimer's disease with late onset
G30.8	Other Alzheimer's disease
G30.9	Alzheimer's disease unspecified

## Sheet: Primary care codes
ESM Table 7 - Primary care Read codes (version 2) for Alzheimer's disease
Code	Description
Eu00.	[X]Dementia in Alzheimer's disease
Eu000	[X]Dementia in Alzheimer's disease with early onset
Eu001	[X}Dementia in Alzheimer's disease with late onset
Eu002	[X]Dementia in Alzheimer's disease, atypical or mixed type
Eu00z	[X]Dementia in Alzheimer's disease, unspecified

## Sheet: Additional diabetes MR analyses
ESM Table 8 - Results from MR IVW, Egger and WME with a 77-SNP diabetes instrument with no overlapping samples
Diabetes	Outcome: Reaction time	Outcome: Visual memory	Outcome: HV	Outcome: WMHV	Outcome: AD
	exp(β) (95% CI)	exp(β) (95% CI)	β (95% CI)	exp(β) (95% CI)	OR (95% CI)
IVW	1.00 (0.99;1.00)	1.00 (0.99;1.02)	-13.92 (-44.17;16.32)	0.99 (0.90;1.07)	1.30 (0.83;2.03)
MR-Egger	1.00 (0.98;1.01)	1.01 (0.99;1.04)	-56.18 (107.04;5.31)	0.93 (0.82;1.07)	1.00 (0.46;2.16)
WME	1.00 (1.00;1.01)	1.00 (0.97;1.03)	-23.05 (70.06;23.96)	0.96 (0.87;1.07)	1.11 (0.53;2.29)
Egger intercept p-value	0.984	0.292	0.05	0.345	0.408
Note. Weights used from Mahajan et al., 2014 GWAS to ensure no sample overlap (UKB was not included in this GWAS); IVW= inverse variance weighted, WME= weighted median estimator, HV=mm3

## Sheet: MR_adjusted_10_PCs
ESM Table 9 - Results from MR IVW, Egger and WME analyses adjusted for 10 principal components
HbA1c (51 SNPs)	Outcome: Reaction time	Outcome: Visual memory	Outcome: HV	Outcome: WMHV	Outcome: AD
	exp(β) (95% CI)	exp(β) (95% CI)	β (95% CI)	exp(β) (95% CI)	OR (95% CI)
IVW	1.00 (0.99;1.02)	0.99 (0.96;1.02)	-22.65 (-82.11;38.70)	1.04 (0.88;1.22)	1.07 (0.41;2.80)
MR-Egger	0.99 (0.96;1.01)	1.00 (0.94;1.06)	-81.23 (-195.11;32.65)	0.98 (0.72;1.32)	1.80 (0.30;10.91)
WME	1.01 (0.98;1.01)	1.01 (0.97;1.05)	-50.02 (-149.32;49.77)	1.08 (0.85;1.38)	1.03 (0.23;4.62)
Egger intercept p-value	0.045	0.636	0.4	0.642	0.499
HbA1c (16 glycaemic SNPs)	Outcome: Reaction time	Outcome: Visual memory	Outcome: HV	Outcome: WMHV
	exp(β) (95% CI)	exp(β) (95% CI)	β (95% CI)	exp(β) (95% CI)
IVW	1.01 (0.99;1.02)	0.97 (0.91;1.04)	-82.34 (-200.06;35.38)	0.99 (0.68;1.40)
MR-Egger	1.01 (0.97;1.05)	1.07 (0.90;1.27)	42.22 (-265.30;349.74)	0.88 (0.33;2.32)
WME	1.00 (0.98;1.02)	1.01 (0.94;1.08)	-32.36 (-194.23;129.51)	1.17 (0.78;1.77)
Egger intercept p-value	0.785	0.216	0.39	0.808
HbA1c (19 erythrocytic SNPs)	Outcome: Reaction time	Outcome: Visual memory	Outcome: HV	Outcome: WMHV
	exp(β) (95% CI)	exp(β) (95% CI)	β (95% CI)	exp(β) (95% CI)
IVW	1.00 (0.99;1.02)	0.99 (0.95;1.02)	18.35 (-72.08;108.78)	1.04 (0.84;1.31)
MR-Egger	0.98 (0.95;1.01)	1.00 (0.93;1.05)	-45.90 (-188.63;96.83)	0.94 (0.65;1.36)
WME	0.99 (0.98;1.01)	1.01 (0.95;1.06)	-44.91 (-162.70;72.88)	1.08 (0.82;1.43)
Egger intercept p-value	0.093	0.636	0.257	0.47
Diabetes (157 SNPs)	Outcome: Reaction time	Outcome: Visual memory	Outcome: HV	Outcome: WMHV	Outcome: AD
	exp(β) (95% CI)	exp(β) (95% CI)	β (95% CI)	exp(β) (95% CI)	OR (95% CI)
IVW	1.00 (1.00;1.00)	1.00 (1.00;1.00)	-4.33 (-14.38;5.71)	0.99 (0.97;1.01)	1.15 (0.87;1.52)
MR-Egger	1.00 (1.00;1.00)	1.00 (0.99;1.01)	-3.35 (-25.95;19.26)	0.97 (0.92;1.01)	1.01 (0.54;1.86)
WME	1.00 (1.00;1.00)	1.00 (0.99;1.01)	-8.70 (-24.81;7.41)	0.98 (0.95;1.01)	1.04 (0.82;1.32)
Egger intercept p-value	0.087	0.377	0.924	0.162	0.636
Reaction time (43 SNPs)	Outcome: HbA1c	Outcome: Diabetes
	β (95% CI)	exp(β) (95% CI)
IVW	-0.67 (-1.70;0.36)	0.94 (0.54;1.65)
MR-Egger	-8.48 (-16.53;-0.43)	1.23 (0.02;120.30)
MR-Egger SIMEX	-3.17 (-8.16;1.82)	0.30 (0.04;2.20)
WME	-0.86 (-1.74;0.02)	0.66 (0.36;1.20)
Egger intercept p-value	0.06	0.906
Egger SIMEX intercept p-value	0.253	0.222
